# Supplementary material for: Emission factors for open and domestic biomass burning for use in atmospheric models
Source: Copernicus journal article supplement (doi:10.5194/acp-11-4039-2011), 2011-05-03
Supplement: Supplementary file 1 [file Tables 1-5_4.27.11.xlsx]

## Sheet: Table 1
Table 1. Emission factors (g kg-1) for species emitted from different types of biomass burninga.
	Tropical Forest	Savanna	Crop Residue	Pasture Maintenance	Boreal Forest	Temperate Forest	Extratropical Forestb
Carbon Dioxide (CO2)	1643 (58)	1686 (38)	1585 (100)	1548 (142)	1489 (121)	1637 (71)	1509 (98)
Carbon Monoxide (CO)	93 (27)	63 (17)	102 (33)	135 (38)	127 (45)	89 (32)	122 (44)
Methane (CH4)	5.07 (1.98)	1.94 (0.85)	5.82 (3.56)	8.71 (4.97)	5.96 (3.14)	3.92 (2.39)	5.68 (3.24)
Acetylene (C2H2)	0.44 (0.35)	0.24 (0.10)	0.27 (0.08)	0.21 (0.29)	0.18 (0.10)	0.29 (0.10)	0.19 (0.090)
Ethylene (C2H4)	1.06 (0.37)	0.82 (0.35)	1.46 (0.59)	1.28 (0.71)	1.42 (0.43)	1.12 (0.35)	1.38 (0.42)
Ethane (C2H6)	0.71 (0.28)	0.66 (0.41)	0.91 (0.49)	0.95 (0.43)	1.79 (1.14)	1.12 (0.67)	1.70 (1.05)
Propadiene (C3H4)	0.016 (0.0066)	0.012 (0.005)	-	0.020 (0.009)	-	-	-
Propylene (C3H6)	0.64 (0.43)	0.79 (0.56)	0.68 (0.37)	0.85 (0.66)	1.13 (0.60)	0.95 (0.54)	1.11 (0.61)
Propyne (C3H4)	-	-	-	-	0.059	-	0.059
Propane (C3H8)	0.126 (0.060)	0.10 (0.067)	0.28 (0.15)	0.22 (0.10)	0.44	0.26 (0.11)	0.42 (0.18)
n-Butane (C4H10)	0.038 (0.023)	0.016 (0.013)	0.072 (0.036)	0.040 (0.018)	0.12	0.083 (0.10)	0.12 (0.14)
i-Butane (C4H10)	0.011 (0.009)	0.0043 (0.0027)	0.025 (0.013)	0.014 (0.0063)	0.042	-	0.042
1-Butene (C4H8)	0.079 (0.024)	0.043 (0.022)	0.134 (0.060)	0.17 (0.077)	0.16	-	0.16
i-Butene (C4H8)	0.11 (0.051)	0.024 (0.0051)	0.117 (0.060)	0.11 (0.05)	0.11	-	0.11
1,3-Butadiene (C4H6)	0.039	0.052 (0.028)	0.151 (0.072)	-	0.14	-	0.14
trans-2-Butene (C4H8)	0.029 (0.013)	0.011 (0.0055)	0.057 (0.030)	0.050 (0.023)	0.04	-	0.04
cis-2-Butene (C4H8)	0.024 (0.010)	0.0084 (0.0043)	0.043 (0.023)	0.040 (0.018)	0.03	-	0.03
n-Pentane (C5H12)	8.03E-03 (8.03E-03)	0.0032 (0.0032)	0.025 (0.012)	0.0056 (0.0025)	0.085	-	0.085
i-Pentane (C5H12)	0.010 (0.010)	0.0022 (0.0032)	0.020 (0.012)	0.0074 (0.0033)	0.038	-	0.038
trans-2-Pentene (C5H10)	0.0033	0.0045 (0.0028)	-	-	-	-	-
cis-2-Pentene (C5H10)	0.0019	0.0025 (0.0018)	-	-	-	-	-
3-Methyl-1-Butene (C5H10)	0.0038	0.0051 (0.0034)	-	-	-	-	-
2-Methyl-2-Butene (C5H10)	0.004	0.0048 (0.0035)	-	-	-	-	-
2-Methyl-1-Butene (C5H10)	0.0044	0.0059 (0.0037)	-	-	-	-	-
Isoprene (C5H8)	0.13 (0.056)	0.039 (0.027)	0.38 (0.16)	0.12 (0.055)	0.15	-	0.15
Cyclopentane (C5H10)	-	-	0.0019 (0.0012)	-	-	-	-
2+3-Methylpentane (C6H14)	-	-	-	-	0.036	-	0.036
2-Methyl-1-Pentene (C6H12)	0.0028	0.0035 (0.0021)	-	-	-	-	-
n-Hexane (C6H14)	0.01	0.013 (0.0074)	-	-	0.055	-	0.055
Heptane (C7H16)	0.0056	0.0070 (0.0072)	-	-	0.048	-	0.048
Benzene (C6H6)	0.39 (0.16)	0.20 (0.084)	0.15 (0.04)	0.70 (0.32)	1.11	-	1.11
Toluene (C6H5CH3)	0.26 (0.13)	0.080 (0.058)	0.19 (0.06)	0.34 (0.15)	0.48	-	0.48
Xylenes (C8H10)	0.11 (0.082)	0.014 (0.024)	-	0.11 (0.050)	0.18	-	0.18
Ethylbenzene (C8H10)	0.050 (0.036)	0.006 (0.010)	-	0.067 (0.030)	0.051	-	0.051
n-Propylbenzene (C9H12)	-	-	-	-	0.018	-	0.018
α-Pinene (C10H16)	-	-	-	-	1.64	-	1.64
β-Pinene (C10H16)	-	-	-	-	1.45	-	1.45
Ethanol (CH3CH2OH)	-	-	-	-	0.055	-	0.055
Methanol (CH3OH)	2.43 (0.80)	1.18 (0.41)	3.29 (1.38)	5.84 (3.42)	2.82 (1.62)	1.93 (1.38)	2.70 (1.75)
Phenol (C6H5OH)	0.45 (0.088)	0.52 (0.36)	0.52 (0.14)	1.68 (3.34)	2.96	0.33 (0.38)	2.60 (3.00)
Formaldehyde (HCHO)	1.73 (1.22)	0.73 (0.62)	2.08 (0.84)	1.90 (1.11)	1.86 (1.26)	2.27 (1.13)	1.92 (1.14)
Glycolaldehyde (C2H4O2)	2.84	0.81 (0.38)	2.01 (0.38)	-	0.77	0.25 (0.45)	0.70 (1.26)
Acetaldehyde (CH3CHO)	1.55 (0.75)	0.57 (0.30)	1.24 (0.28)	2.40 (1.08)	-	-	-
Acrolein (C3H4O)	0.65 (0.23)	-	-	-	-	-	-
Furaldehydes	0.29 (0.0010)	-	-	-	-	-	-
Propanal (C3H6O)	0.10 (0.026)	-	-	0.16 (0.074)	-	-	-
Methyl Propanal (C4H8O)	0.18 (0.075)	-	-	0.33 (0.15)	-	-	-
Hexanal (C6H12O)	0.01 (0.005)	-	-	0.034 (0.015)	-	-	-
Acetone (C3H6O)	0.63 (0.17)	0.16 (0.13)	0.45 (0.07)	1.05 (0.47)	0.75	-	0.75
Methyl Vinyl Ether (C3H6O)	-	0.16 (0.045)	0.08 (0.01)	-	-	-	-
Methacrolein (C4H6O)	0.15 (0.045)	-	-	0.40 (0.18)	0.087	-	0.087
Crotonaldehyde (C4H6O)	0.24 (0.068)	-	-	0.60 (0.27)	-	-	-
2,3-Butanedione (C4H6O2)	0.73 (0.22)	-	-	1.58 (0.71)	-	-	-
Methyl Vinyl Ketone (C4H6O)	0.39 (0.11)	-	-	1.00 (0.45)	0.2	-	0.2
Methyl Ethyl Ketone (C4H8O)	0.50 (0.21)	-	-	0.94 (0.42)	0.22	-	0.22
2-Pentanone (C5H10O)	0.08 (0.024)	-	-	0.17 (0.077)	-	-	-
3-Pentanone (C5H10O)	0.03 (0.011)	-	-	0.08 (0.034)	-	-	-
Furan (C4H4O)	0.41 (0.10)	0.17 (0.058)	0.11 (0.04)	1.02 (0.43)	0.80 (0.50)	0.20 (0.21)	0.72 (0.62)
3-Methylfuran (C5H6O)	0.59 (0.20)	-	-	1.41 (0.64)	-	-	-
2-Methylfuran (C5H6O)	0.08 (0.028)	-	-	0.20 (0.091)	-	-	-
Other substituted furans	1.21 (0.016)	-	-	-	-	-	-
C6 Carbonyls	0.24 (0.11)	-	-	0.61 (0.28)	-	-	-
Acetol (C3H6O2)	1.13 (0.12)	0.45 (0.24)	3.77 (0.91)	6.18 (5.60)	-	-	-
Acetonitrile (CH3CN)	0.41 (0.10)	0.11 (0.058)	0.21 (0.06)	0.55 (0.25)	0.61	-	0.61
Propenenitrile (C3H3N)	0.04 (0.01)	0.051 (0.022)	0.03 (0.002)	-	-	-	-
Propanenitrile (C3H5N)	0.09	0.031 (0.014)	0.06 (0.002)	-	-	-	-
Pyrrole (C4H5N)	0.12 (0.038)	-	-	-	-	-	-
Formic Acid (HCOOH)	0.79 (0.66)	0.21 (0.096)	1.00 (0.49)	0.20 (0.64)	0.57 (0.46)	0.35 (0.33)	0.54 (0.47)
Acetic Acid (CH3COOH)	3.05 (0.90)	3.55 (1.47)	5.59 (2.55)	10.4 (6.8)	4.41 (2.66)	1.97 (1.66)	4.08 (2.99)
Hydrogen Cyanide (HCN)	0.42 (0.26)	0.41 (0.15)	0.29 (0.38)	0.46 (0.45)	1.52 (0.82)	0.73 (0.19)	1.41 (0.60)
Dimethyl Sulfide (C2H6S)	1.35E-03 (1.71E-03)	0.0013 (0.0011)	-	-	0.00465	-	0.00465
Carbonyl Sulfide (OCS)	0.025	-	-	-	0.46 (0.47)	-	0.46 (0.47)
Chloromethane (CH3Cl)	0.053 (0.038)	0.055 (0.036)	-	0.29 (0.13)	0.059	-	0.059
Dibromomethane (CH2Br2)	-	-	-	-	8.28e-05	-	8.28e-05
1,2-Dichloroethane (C2H4Cl2)	-	-	-	-	0.00129	-	0.00129
Methyl Bromide (CH3Br)	2.83E-03 (2.38E-03)	8.53E-04 (8.62E-04)	-	5.71E-03 (2.57E-03)	0.00364	-	0.00364
Methyl Iodide (CH3I)	2.50E-03 (3.45E-03)	5.06E-04 (3.88E-04)	-	3.48E-03 (1.56E-03)	0.000788	-	0.000788
Trichloromethane (CHCl3)	2.94E-04 (6.75E-03)	0.012 (0.020)	-	6.32E-04 (2.84E-04)	-	-	-
Dichlorodifluoromethane (CCl2F2)	0.0028	-	-	-	-	-	-
Ethylchloride (C2H5Cl)	-	-	-	-	0.000747	-	0.000747
Ammonia (NH3)	1.33 (1.21)	0.52 (0.35)	2.17 (1.27)	1.47 (1.29)	2.72 (2.32)	0.78 (0.82)	2.46 (2.35)
Methyl Nitrate (CH3ONO2)	8.29E-03 (1.60E-02)	5.1E-04 (3.7E-04)	-	-	0.00283	-	0.00283
Ethyl Nitrate (C2H5NO3)	0.0057	-	-	-	0.00178	-	0.00178
n-Propyl Nitrate (C3H7NO3)	0.0003	-	-	-	0.000323	-	0.000323
i-Propyl Nitrate (C3H7NO3)	0.001	-	-	-	0.00323	-	0.00323
2-Butyl Nitrate (C4H9NO3)	0.0006	-	-	-	0.00384	-	0.00384
3-Pentyl Nitrate (C5H11NO3)	-	-	-	-	0.000727	-	0.000727
2-Pentyl Nitrate (C5H11NO3)	-	-	-	-	0.00097	-	0.00097
3-Methyl-2-Butyl Nitrate (C5H11NO3)	-	-	-	-	0.00115	-	0.00115
3-Ethyltoluene (C9H12)	-	-	-	-	0.024	-	0.024
2-Ethyltoluene (C9H12)	-	-	-	-	0.011	-	0.011
4-Ethyltoluene (C9H12)	-	-	-	-	0.015	-	0.015
1,2,3-Trimethylbenzene (C9H12)	-	-	-	-	0.051	-	0.051
1,2,4-Trimethylbenzene (C9H12)	-	-	-	-	0.03	-	0.03
1,3,5-Trimethylbenzene (C9H12)	-	-	-	-	0.00586	-	0.00586
Hydrogen (H2)	3.36 (1.30)	1.70 (0.64)	2.59 (1.78)	-	-	2.03 (1.79)	2.03 (1.79)
Sulfur Dioxide (SO2)	0.40 (0.19)	0.48 (0.27)	-	0.32 (0.14)	-	-	-
Nitrous Acid (HONO)	1.18	0.2	-	0.16 (0.07)	-	0.52 (0.15)	0.52 (0.15)
Nitrogen Oxides (NOx as NO)	2.55 (1.40)	3.9 (0.80)	3.11 (1.57)	0.75 (0.59)	0.90 (0.69)	2.51 (1.02)	1.12 (0.69)
Nitrous Oxide (N2O)	-	-	-	-	0.41	0.16 (0.21)	0.38 (0.35)
NMOC (identified)	26.0 (8.8)	12.4 (6.2)	25.7 (9.8)	44.8 (30.1)	29.3 (10.1)	11.9 (7.6)	27.0 (13.8)
NMOC (identified + unidentified)c	51.9	24.7	51.4	89.6	58.7	23.7	54
Total Particulate Carbon	5.24 (2.91)	3.00 (1.43)	-	10.6 (4.8)	-	-	-
Total Suspended Particulate (TSP)	13	-	-	-	-	-	-
CN (particles 0.003-3 µm diameter)d	5.9e+16	-	-	-	-	-	-
PM2.5e	9.1 (3.5)	7.17 (3.42)	6.26 (2.36)	14.8 (6.7)	15.3 (5.9)	12.7 (7.5)	15.0 (7.5)
PM10	18.5 (4.1)	-	-	28.9 (13.0)	-	-	-
Black Carbon (BC)	0.52 (0.28)	0.37 (0.20)	0.75	0.91 (0.41)	-	-	0.56 (0.19)f
Organic Carbon (OC)	4.71 (2.73)	2.62 (1.24)	2.3	9.64 (4.34)	-	-	8.6-9.7f
Oxylate (C2O4)	0.04 (0.034)	0.0055 (0.0055)	-	0.040 (0.018)	-	-	-
Nitrate (NO3)	0.11 (0.050)	0.016 (0.013)	-	0.14 (0.063)	-	-	-
Phosphate (PO4)	5.56E-03 (8.99E-03)	0.0045 (0.0060)	-	1.07E-03 (4.80E-04)	-	-	-
Sulfate (SO4)	0.13 (0.088)	0.018 (0.009)	-	0.19 (0.086)	-	-	-
Ammonium (NH4)	5.64E-03 (1.72E-02)	0.0035 (0.0035)	-	3.97E-03 (1.79E-03)	-	-	-
Cl	0.15 (0.16)	0.23 (0.055)	-	0.24 (0.11)	-	-	-
Ca	0.085 (0.089)	0.021 (0.018)	-	0.020 (0.009)	-	-	-
Mg	0.040 (0.034)	0.016 (0.007)	-	0.030 (0.014)	-	-	-
Na	6.37E-03 (5.46E-03)	0.0055 (0.0045)	-	0.030 (0.014)	-	-	-
K	0.29 (0.28)	0.23 (0.053)	-	0.34 (0.15)	-	-	-
aSee Section 2.3 for guidance in use. Emission factors are shown with an estimate of the natural variation in parenthesis, when available
bEF calculated from a weighted average of boreal and temperate forest EF based on GFED3 biomass consumption estimates
cEstimated (see Sect. 3.4)
dNumber of particles per kg fuel burned
ePM1-PM5 categorized as PM2.5
fSource is Andreae and Merlet (2001)

## Sheet: Table 2
Table 2. Emission factors (g kg-1) for species emitted from different types of biomass burninga.
Compound	Peatlandb	Chaparral	Open Cooking	Patsari Stoves	Charcoal Makingc	Charcoal Burningd	Dung Burning	Garbage Burning
Carbon Dioxide (CO2)	1563 (65)	1710 (39)	1548 (125)	1610 (114)	1626 (244)	2385	859 (15)	1453 (69)
Carbon Monoxide (CO)	182 (60)	67 (13)	77 (26)	42 (19)	255 (52)	189 (36)	105 (10)	38 (19)
Methane (CH4)	11.8 (7.8)	2.51 (0.72)	4.86 (2.73)	2.32 (1.38)	39.6 (11.4)	5.29 (2.42)	11.0 (3.3)	3.66 (4.39)
Acetylene (C2H2)	0.14 (0.093)	0.20 (0.08)	0.97 (0.50)	0.28 (0.01)	0.21 (0.02)	0.42	-	0.40 (0.28)
Ethylene (C2H4)	1.79 (0.72)	0.75 (0.18)	1.53 (0.66)	0.46 (0.12)	3.80 (1.15)	0.44 (0.23)	1.12 (0.23)	1.26 (1.04)
Ethane (C2H6)	-	0.36 (0.11)	1.50 (0.50)	-	12.2 (9.3)	0.41 (0.13)	-	-
Propylene (C3H6)	2.30 (0.74)	0.38 (0.13)	0.57 (0.34)	0.03	4.12 (1.89)	-	1.89 (0.42)	1.26 (1.42)
Propane (C3H8)	-	0.19 (0.09)	-	-	-	-	-	-
Butane (C4H10)	-	0.14 (0.07)	-	-	-	-	-	-
Isoprene (C5H8)	1.07 (0.44)	-	-	-	-	-	-	-
Toluene (C6H5CH3)	1.21 (0.69)	-	-	-	-	-	-	-
Benzene (C6H6)	2.46 (1.21)	-	-	-	-	-	-	-
Methanol (CH3OH)	5.36 (3.27)	0.80 (0.28)	2.26 (1.27)	0.39 (0.39)	54.9 (27.9)	1.01	4.14 (0.88)	0.94 (1.25)
Acetol (C3H6O2)	1.92 (0.20)	-	-	-	21.6 (35.3)	-	9.60 (2.38)	-
Phenol (C6H5OH)	4.36 (5.06)	0.45 (0.21)	3.32	-	10.4 (6.6)	-	2.16 (0.36)	-
Furan (C4H4O)	1.51 (0.37)	0.18 (0.10)	0.4	-	3.94 (2.30)	-	0.95 (0.22)	-
Formaldehyde (HCHO)	1.69 (1.62)	0.83 (0.25)	2.08 (0.86)	0.37 (0.40)	3.62 (2.42)	0.6	-	0.62 (0.13)
Glycolaldehyde (C2H4O2)	2.62 (4.18)	0.23 (0.20)	1.42	-	-	-	-	-
Acetaldehyde (CH3CHO)	2.81 (1.36)	-	-	-	-	-	-	-
Carbonyl Sulfide (OCS)	1.20 (2.21)	-	-	-	-	-	-	-
Acetic Acid (CH3COOH)	7.08 (3.40)	1.10 (0.50)	4.97 (3.32)	0.34	44.8 (27.3)	2.62	11.7 (5.08)	2.42 (3.32)
Formic Acid (HCOOH)	0.54 (0.71)	0.06 (0.04)	0.22 (0.17)	0.0048	0.68 (0.20)	0.063	0.46 (0.31)	0.18 (0.12)
Acetone (C3H6O)	1.08 (0.29)	-	-	-	-	-	-	-
Hydrogen Cyanide (HCN)	5.00 (4.93)	0.38 (0.12)	-	-	0.21 (0.17)	-	0.53 (0.30)	0.47
Methyl Ethyl Ketone (C4H8O)	-	-	-	-	-	-	-	-
Hydrogen Chloride (HCl)	-	0.17 (0.14)	-	-	-	-	-	3.61 (3.27)
Methyl Vinyl Ether (C3H6O)	0.85	-	-	-	-	-	-	-
Acetonitrile (CH3CN)	3.70 (0.90)	-	-	-	-	-	-	-
Sulfur Dioxide (SO2)	-	0.68 (0.13)	-	-	-	-	0.06	0.5
Hydrogen (H2)	-	-	-	-	-	-	-	0.091
Ammonia (NH3)	10.8 (12.4)	1.03 (0.66)	0.87 (0.40)	0.03	1.24 (1.44)	0.79	4.75 (1.00)	0.94 (1.02)
Nitrogen Oxides (NOx as NO)	0.80 (0.57)	3.26 (0.95)	1.42 (0.72)	-	0.22 (0.22)	1.41	0.5	3.74 (1.48)
Nitrous Oxide (N2O)	-	0.25 (0.18)	-	-	-	0.24	-	-
Nitrous Acid (HONO)	-	0.41 (0.15)	-	-	-	-	-	-
TNMHC as CH4	-	-	2.89 (1.21)	3.76 (4.53)	-	-	-	-
TNMHC as gC	-	-	2.27 (2.07)	-	-	-	-	-
NMOC (identified)	48.7 (32.4)	6.0 (2.4)	19.2 (7.6)	1.87 (0.92)	161 (115)	5.56	32.6 (10.2)	7.5 (7.6)
NMOC (identified + unidentified)e	97.3	12.1	57.7	5.62	321	11.1	97.7	22.6
Total Suspended Particulate (TSP)	-	15.4 (7.2)	4.55 (1.53)	3.34 (1.68)	0.7-4.2	2.38	-	-
Total Particulate C	-	-	-	-	-	-	22.9	-
PM2.5f	-	11.9 (5.8)	6.64 (1.66)	-	-	-	-	9.8 (5.7)
Black Carbon (BC)	0.20 (0.11)	1.3	0.83 (0.45)	0.74 (0.37)	0.02 (0.02)	1.0g	0.53g	0.65 (0.27)
Organic Carbon (OC)	6.23 (3.60)	3.7	2.89 (1.23)	1.92 (0.90)	0.74 (0.72)	1.3g	1.8g	5.27 (4.89)
aSee Section 2.3 for guidance in use. Emission factors are shown with an estimate of the natural variation in parenthesis, when available
bEF include an assumed tropical forest overstory
cEF reported in units of g of compound emitted per kg of charcoal produced
dEF reported in units of g of compound emitted per kg of charcoal burned
eEstimated (see Sect. 3.4)
fPM1-PM5 categorized as PM2.5
gSource is Bond et al. (2004)

## Sheet: Table 3
Table 3. Biomass loading, combustion factor, and biomass consumption estimates for various fuel types.
Fuel Type	Reference	Location	Vegetation specifics	Biomass Loading (Mg/ha)	Combustion Factor (%)	Biomass Consumption (Mg/ha)
Tropical Dry Forest	Kauffman et al. (2003)	Mexico	Deforestation	118.2-134.9	62.4-80.2	73.7-108.1
	Kauffman et al. (1993)	Brazil	Deforestation	73.8	87	64
	Jaramillo et al. (2003)	Mexico	Deforestation	112.23	-	-
	Shea et al. (1996)	Zambia	Understory	5.1-5.8	88-74	4.5-4.3
	Hoffa et al. (1999)	Zambia	Understory	10.4	22.3	2.3
	Ward et al. (1992)	Brazil		9.3	78	7.3
	van der Werf et al. (2010), GFED3	Central America	Central America (CEAM)	-	-	29.8
Evergreen Tropical Forest	Ward et al. (1992)	Brazil		292.4	52.56	154.97
	Fearnside et al. (1993)	Brazil		265	27.5	73
	Carvalho et al. (1998)	Brazil		401.5	20.47	82
	Carvalho et al. (2001)	Brazil		496	50	248
	Hughes et al. (2000)	Mexico		403	95	380
	Kauffman et al. (1995)	Brazil		355.44	51.6	184.81
	Guild et al. (1998)	Brazil		354.8	47	166.76
	van der Werf et al. (2010), GFED3	Equatorial Asia	Equatorial Asia (EQAS)	-	-	190
Crop Residue	Zarate et al. (2005)	Spain	Cereal crops		80	1.14
	Hughes et al. (2000)	Mexico	Cornfield	23	-	-
	Lara et al. (2005)	Brazil	Sugarcane	-	-	20
Peatland	Page et al. (2002)	Indonesia	Peat plus overstory	-	-	510
	Ballhorn et al. (2009)	Indonesia	Peat only	-	-	383
Pasture	Hughes et al. (2000)	Mexico		24	-	-
	Guild et al. (1998)	Brazil		66.3	31	21
	Kauffman et al. (1998)	Brazil		53-119	21-84	24.5-44.5
	Kauffman et al. (2003)	Mexico		29.0 - 40.3	75 - 63	21.8-25.4
	Jaramillo et al. (2003)	Mexico		26.9	-	-
Savanna	Ward et al. (1992)	Brazil	Tropical savanna	7.2	98.5	7.1
	Savadogo et al. (2007)	West Africa	Woodland savanna	-	-	4.1
	Shea et al. (1996)	South Africa		3.8	76	2.9
Boreal Forest	Goode at al. (2000)	Alaska, USA		-	-	36
	S. Drury (unpublished work, 1998)	Alaska, USA	Wildfire B309, 6/28/1997	-	-	37
	van der Werf et al. (2010), GFED3	North America	Boreal North America (BONA)	-	-	53.2
	FIRESCAN Science Team (1996)	Bor Forest Island, Siberia	Prescribed crown fire	-	-	38
	Cofer et al. (1998)	Northwest Territories, Canada	Prescribed crown fire	-	-	42.7
	van der Werf et al. (2010), GFED3	Asia	Boreal Asia (BOAS)	-	-	39.6
	Kasischke et al. (1999)	Global estimate		-	-	10-60
	Stocks (1991)	Global estimate		-	-	25
	Cahoon et al. (1994, 1996)	Global estimate		-	-	25
	de Groot et al. (2009)	Canada		-	-	22
Temperate Forest	Sah et al. (2006)	Florida, USA	Florida Keys pine forests	60.6	-	-
	Snyder (1986)	Florida, USA	Everglades NP	75-90	-	-
	van der Werf et al. (2010), GFED3	North America	Temperate North America (TENA)	-	-	12.5
	Yokelson et al. (2007b)	Mexico	Pine dominated forest	-	-	6.5-32
	Campbell et al. (2007)	Oregon, USA	Mixed conifer forest	-	-	34-44
Chaparral/Shrub	Cofer et al. (1988)	S. California, USA	Chaparral	-	-	20-70
	Clinton et al. (2006)	S. California, USA	Chaparral	28.3	-	-
	Ottmar et al. (2000)	S. California, USA	Chaparral	-	-	15.0214
	Hardy et al. (1996)	S. California, USA	Chaparral	-	-	24.5

## Sheet: Table 4
Table 4. Global estimates of biomass consumption in units of mass of dry matter burned (Tg) per year.
Year measured	1990's	mid 1990's	2000	1993/1995	1985
	Andreae and Merlet (2001)a	Bond et al. (2004)b	Fernandes et al. (2007)c	Ludwig et al. (2003)d	Yevich and Logan (2003)e	Otherf	Average
Savanna	3160	3572	-	-	-	-	3366
Forest	1970	1939	-	-	-	-	1954.5
Tropical forest	1330	-	-	-	-	-	1330
Extratropical forest	640	-	-	-	-	-	640
Biofuel	2897	-	2458	-	2447	-	2600.67
Cooking Stoves	-	-	1351	-	-	-	1351
Open Cooking (fuelwood)	-	-		1062	1714	-
Charcoal Burning	38	-	39	24		-	38.5
Charcoal Making	43	-	-		-	-	43
Crop Residue (for biofuel)	-	-	495	-	597	-	546
Dung	-	-	75	-	136	-	105.5
Industrial	-	-	498	-	-	-	498
Peat	-	-	-	-	-	3400	3400
Pasture Maintenance	-	-	-	-	-	240	240
Crop Residue (field burning)	540	475	-	-	451	-	488.667
Garbage Burning	-	-	-	-	-	1000	1000
aSource is Andreae and Merlet (2001)
Value of 640 Tg/yr is cited in original work as "extratropical forest", which encompasses both boreal and temperate forest types
"Biofuel" global estimate derived from the sum of biofuel burning, charcoal making, and charcoal burning estimates
Charcoal making estimate of 43 Tg/yr was calculated assuming a 27% charcoal yield (Bertschi et al., 2003a)
bSource is Bond et al. (2004). Estimates from Table 4 in original work
cSource is Fernandes et al. (2007). Original work defines "biofuel" as fuelwood (open cooking), charcoal burning, crop residues and dung
dSource is Ludwig et al. (2003)
eSource is Yevich and Logan (2003). "Biofuel" defined as woodfuel, charcoal burning, crop residues and dung
fOther. Garbage burning estimate of 1000 Tg/yr from Christian et al. (2010), peat estimate of 3400 Tg/yr from Page et al. (2002),
and pasture maintenance estimate of 240 Tg/yr from Yokelson et al. (2008)

## Sheet: Table 5
Table 5. Measured and predicted estimates of NMOC emitted from biomass burning on an annual basis.
Fuel Type	Total Combusted Biomass (Tg yr-1)a	EF(CO) (g kg-1 dry biomass)b	CO global production (Tg yr-1)	EF (NMOC, identified) (g kg-1 dry biomass)b	EF (NMOC, estimation of total) (g kg-1 dry biomass)c	NMOC global production (Tg yr-1)	EF (BC) (g kg-1 dry biomass)	BC global production (Tg yr-1)
Savanna	3366	63	212.058	12.4	24.7	83.1402	0.37	1.24542
Extratropical	640	122	78.08	27	54	34.56	0.56	0.3584
Tropical Forest	1330	93	123.69	26	51.9	69.027	0.52	0.6916
Biofuel	2601	77	200.277	19.2	57.7	150.078	0.83	2.15883
Open Cooking/Cooking Stoves	1351	59.5	80.3845	10.535	31.605	42.6984	0.785	1.06053
Dung Burning	106	105	11.13	32.6	97.7	10.3562	0.53	0.05618
Charcoal Making	43	255	10.965	161	321	13.803	0.02	0.00086
Charcoal Burning	39	189	7.371	5.56	11.1	0.4329	1	0.039
Pasture Maintenance	240	135	32.4	44.8	89.6	21.504	0.91	0.2184
Crop Residue	489	102	49.878	25.7	51.4	25.1346	0.75	0.36675
Garbage Burning	1000	38	38	7.5	22.6	22.6	0.65	0.65
Peatd	3400	182	618.8	48.7	97.3	330.82	0.2	0.68
Avg. model year- global estimate	-	-	734.383	-	-	406.043	-	5.6894
El Nino year- global estimate	-	-	1353.18	-	-	736.863	-	6.3694
aTotal combusted biomass estimates are from Table 4 averages (this work), unless otherwise noted
Charcoal making estimate is in units of Tg charcoal made per year
Charcoal burning estimate is in units of Tg charcoal burned per year
bData are from Tables 1 and 2 of this work
EF for open cooking fires was used to represent EF for all biofuel since cooking fires are the dominant source of biofuel emissions globally
EF for open cooking/cooking stoves was taken as the averages of open cooking and cooking stove EF
Charcoal making EF in units of g per kg charcoal made
Charcoal burning EF in units of g per kg charcoal burned
cMultiplication factors to estimate total EF(NMOC) (as identified + unidentified NMOC) is described in Section 3.4
dEmissions from peat are added to global totals to estimate a typical emissions during an El Nino year

## Sheet: Version 2 Update Information
This sheet tracks all the updates to Tables 1-5.
Version 2 was started on January 14 2011 and documents changes until April 27 2011 (prior to submission to ACP).
Table	Column	Details
1	All	EF(NMHC) row deleted
	B	Yokelson et al. (2011) added
		EF(HONO) updated
		EF(glycolaldehyde) updated
	C	Yokelson et al. (2011) added
		EF(acetol) updated
		EF(HONO) added
		EF(glycolaldehyde) updated
	D	Yokelson et al. (2011) added
		Yokelson et al. (2009) removed
		Christian et al. (2010) removed
		EF(acetol) updated
		EF(NOx as NO) updated
		EF(acetaldehyde) updated
		EF(phenol) updated
		EF(glycolaldehyde) updated
		EF(methyl vinyl ether) updated
		EF(furan) updated
		EF(acetone) updated
		EF(acetonitrile) updated
		EF(benzene) updated
		EF(toluene) updated
		EF(propenenitrile) updated
		EF(propanenitrile) updated
		EF(isoprene) updated
		EF(NMOC, identified) updated
		EF(NMOC, identified + unidentified) updated
		EF(BC) updated
		EF(OC) updated
	F	Simpson et al. (2011) updated
		3-Ethyltoluene (C9H12) added
		2-Ethyltoluene (C9H12) added
		4-Ethyltoluene (C9H12) added
		1,2,3-Trimethylbenzene (C9H12) added
		1,2,4-Trimethylbenzene (C9H12) added
		1,3,5-Trimethylbenzene (C9H12) added
		Dibromomethane (CH2Br2) added
		1,2-Dichloroethane (C2H4Cl2) added
		PM48 (TSP) removed
		EF(PM2) removed
		Dichloromethane (CH2Cl2) removed
		Trichloroethylene (C2HCl3) row removed
		EF(glycolaldehyde) updated
	G	Burling et al. (in prep) updated
		Yokelson et al. (2011) added
	H	Recalculated given updated boreal and temperate EF
		EF(glycolaldehyde) updated
2	B	EF(OC) and EF(BC) added
		EF(acetol) updated
		EF(glycolaldehyde) updated
	C	Burling et al. (in prep) updated
	D	EF(glycolaldehyde) updated
3	All	Added Yokelson et al. (2007b)
	All	Added Campbell et al. (2007)
5	C	EF(CO) updated, row 4
	D	CO global production updated, row 4
	E	All EF(NMOC, identified) updated except rows 8-11
	F	All EF(NMOC, estimation of total) updated except rows 10-11
	G	All NMOC global production estimates updated except rows 8-11
	H	EF(BC) updated, row 12
	I	BC global production updated, row 12

## Sheet: Version 1 Update Information
This sheet tracks all the updates to Tables 1-5.
Version 1 was produced on November 8, 2010
Table	Details	Cell	Previous	Updated
1	Added row 78, dichloromethane (CH2Cl2)	F78	-	0.00242
		H78	-	0.00242
	Temperate EF(NMOC, identified)	G98	22.3 (10.3)	14.0 (6.4)
	Extratropical EF (NMOC, identified)	H98	24.8 (10.7)	26.4 (10.8)
	Temperate EF (NMOC, identified + unidentified)	G99	44.7	28.1
	Extratropical EF (NMOC, identified + unidentified)	H99	49.6 (5.7)	52.7 (28.4)
	2+3-Methylpentane (C6H14)	A29	2,3-Methylpentane (C6H12)	2+3-Methylpentane (C6H14)
	Boreal EF(NMOC, identified)	F98	25.2 (10.0)	28.3 (10.0)
	Boreal EF(NMOC, identified + unidentified)	F99	50.4	56.5
	Boreal EF(HCN)	F72	1.42 (0.76)	1.52 (0.81)
	Boreal EF(CH3CN)	F66	0.62	0.59
	Extratropical EF(HCN)	H72	1.33 (0.53)	1.42 (0.56)
	Extratropical EF (CH3CN)	H66	0.62	0.59
2	Chaparral EF(HONO)	C36	0.27 (0.19)	0.39 (0.15)
5	Extratropical EF(NMOC, identified)	E4	24.8	26.4
	Extratropical EF(NMOC, identified + unidentified)	F4	49.6	52.8
	Extratropical EF (NMOC, global production)	G4	32	34
	Global estimate of NMOC (average year)	G17	437	412
	Global estimate of NMOC (El Nino year)	G18	769	744
	Deleted the chaparral row	row 6	-	-
	Crop Residue EF (NMOC, identified + unidentified)	F12	166.2	110.8
	Crop Residue EF (NMOC, global production)	G12	81.3	54.2
