# Supplementary material for: Emission factors for open and domestic biomass burning for use in atmospheric models
Source: Copernicus journal article supplement (doi:10.5194/acp-11-4039-2011), 2011-05-03
Supplement: Supplementary file 2 [file Tables S1-S14_4.27.2011.xlsx]

## Sheet: S1. Savanna
Table S1. Emission factors for savanna fires
	Lab		Airborne		Airborne		Airborne		Airborne		Lab
	Savanna from Christian et al.[2003]a	Savanna uncertaintyb	Savanna from Yokelson et al.[2003]c	Savanna uncertaintyd	Savanna from Sinha et al.[2003]e	Savanna uncertaintyf	Savanna from Ferek et al.[1998]g	Savanna uncertaintyh	Savanna from Yokelson et al.[2011]i	Savanna uncertaintyj	Imperata Cylindrica from Christian et al. [2003]k	Imperata Cylindrica uncertaintyl	Savanna Averagem	Savanna Average Uncertaintyn
Carbon Dioxide (CO2)			1703	39	1700	60	1737	10	1660	39	1629	19	1685.8	37.6298
Carbon Monoxide (CO)			71.5	21.7	68	30	43.9	1.2	79.3	18.1	51.6	8.6	62.86	17.0389
Methane (CH4)			2.19	1	1.7	0.98	1.19	0.2	3.74	1.06	0.9	0.5	1.944	0.850947
Acetylene (C2H2)			0.26	0.05	0.22	0.095	0.33	0.15	0.24	0.15	0.13	0.05	0.236	0.103873
Ethylene (C2H4)			1.19	0.35	0.64	0.3	0.91	0.3	0.91	0.36	0.47	0.26	0.824	0.345184
Ethane (C2H6)					0.21	0.12	0.41	0.3	1.37	0.71			0.663333	0.4072
Propadiene (C3H4)							0.012	0.005					0.012	0.005
Propylene (C3H6)					0.23	0.14	0.21	0.04	2.47	2.14	0.24	0.22	0.7875	0.556528
Propane (C3H8)					0.054	0.041	0.15	0.08					0.102	0.0669216
n-Butane (C4H10)					0.016	0.01	0.0159	0.0149					0.01595	0.012704
i-Butane (C4H10)					0.005	0.0037	0.00351	0.00183					0.004255	0.00272357
1-Butene (C4H8)					0.041	0.027	0.0441	0.0138					0.04255	0.0219368
i-Butene (C4H8)							0.024	0.0051					0.024	0.0051
1,3 Butadiene (C4H6)					0.052	0.028							0.052	0.028
trans-2-Butene (C4H8)					0.013	0.009	0.008	0.002					0.0105	0.005465
cis-2-Butene (C4H8)					0.0097	0.0065	0.007	0.002					0.00835	0.00430114
n-Pentane (C5H12)					0.0045	0.0032	0.00189	0.00232					0.003195	0.00320494
i-Pentane (C5H12)							0.00222	0.0032					0.00222	0.0032
trans-2-Pentene (C5H10)					0.0045	0.0028							0.0045	0.0028
cis-2-Pentene (C5H10)					0.0025	0.0018							0.0025	0.0018
3-Methyl-1-Butene (C5H10)					0.0051	0.0034							0.0051	0.0034
2-Methyl-2-Butene (C5H10)					0.0048	0.0035							0.0048	0.0035
2-Methyl-1-Butene (C5H10)					0.0059	0.0037							0.0059	0.0037
Isoprene (C5H8)					0.042	0.022	0.015	0.005			0.06	0.06	0.039	0.0265036
2-Methyl-1-Pentene (C6H12)					0.0035	0.0021							0.0035	0.0021
n-Hexane (C6H14)					0.013	0.0074							0.013	0.0074
n-Heptane (C7H16)					0.007	0.0072							0.007	0.0072
Benzene (C6H6)					0.18	0.09	0.31	0.14			0.1	0.03	0.196667	0.0837435
Toluene (C6H5CH3)					0.13	0.1	0.07	0.06			0.04	0.02	0.08	0.0579914
m-Xylene (C8H10)							0.0076	0.0132					0.0076	0.0132
p-Xylene (C8H10)							0.00207	0.00358					0.00207	0.00358
o-Xylene (C8H10)							0.0039	0.00676					0.0039	0.00676
Xylenes (C8H10)													0.01357	0.0235198
Ethylbenzene (C8H10)							0.00595	0.0103					0.00595	0.0103
Methanol (CH3OH)			1.17	0.46					1.99	0.85	0.375	0.05	1.17833	0.405228
Phenol (C6H5OH)	0.829908	0.307066									0.22	0.2	0.524954	0.364332
Formaldehyde (HCHO)			1.06	0.39					0.6	0.8	0.54	0.26	0.733333	0.620085
Glycolaldehyde (C2H4O2)	1.03988	0.384756									0.5805	0.3225	0.81019	0.382398
Acetaldehyde (CH3CHO)	0.760045	0.281217									0.38	0.24	0.570023	0.295036
Acetone (C3H6O)	0.19	0.0703									0.13	0.14	0.16	0.12883
Methyl Vinyl Ether (C3H6O)	0.244903	0.0906143									0.08	0.01	0.162452	0.0448621
Furan (C4H4O)	0.20882	0.0772636									0.14	0.04	0.17441	0.0576521
Acetol (C3H6O2)	0.624926	0.231223									0.28	0.18	0.452463	0.237309
Acetonitrile (CH3CN)	0.125906	0.0465854									0.09	0.06	0.107953	0.0582019
Propenenitrile (C3H3N)	0.0610339	0.0225826									0.04	0.02	0.050517	0.0222188
Propanenitrile (C3H5N)	0.0422247	0.0156231									0.02	0.01	0.0311124	0.0136841
Formic Acid (HCOOH)			0.295238	0.0857143					0.27	0.15	0.0714286	0.0333333	0.212222	0.0957517
Acetic Acid (CH3COOH)			2.42	0.9					7.5	3.24	0.73	0.32	3.55	1.47384
Hydrogen Cyanide (HCN)			0.53	0.15					0.53	0.28	0.16	0.04	0.406667	0.152469
Dimethyl Sulfide (C2H6S)					0.0013	0.0011							0.0013	0.0011
Chloromethane(CH3Cl)					0.07	0.048	0.04	0.025					0.055	0.0360833
Methyl Bromide (CH3Br)					0.001	0.0008	0.000706	0.000836					0.000853	0.000861948
Methyl Iodide (CH3I)					0.00045	0.00039	0.000562	0.000367					0.000506	0.000388263
Trichloromethane (CHCl3)							0.012	0.02					0.012	0.02
Methyl Nitrate (CH3ONO2)					0.00051	0.00037							0.00051	0.00037
Ammonia (NH3)			0.28	0.14					0.57	0.26	0.7	0.68	0.516667	0.353169
Oxylate (C2O4)							0.0055	0.0055					0.0055	0.0055
Sulfur Dioxide (SO2)					0.43	0.3	0.53	0.19					0.48	0.26623
Nitrous Acid (HONO)													0.199136
Nitric Oxide (NO)							0.34	0.18	4.22	0.68	1.13	0.2	1.89667	0.636225
Nitrogen Dioxide (NO2)									4.46	3.13			4.46	3.13
Nitrogen Oxides (NOx as NO)			3.37	0.64			2.3	0.6	6.09	0.88			3.92	0.800164
Hydrogen (H2)									1.7	0.64			1.7	0.64
NMOC (identified)													12.3641	6.216
NMOC (identified + unidentified)													24.7283
OC					2.3	1.2	2.94	1.23					2.62	1.23896
BC					0.39	0.19	0.35	0.2					0.37	0.196462
Total Particulate Carbon					2.7	1.4	3.3	1.43					3	1.43348
PM2.5 (PM1-PM5)					10	7.5	3.86	0.36	7.65	2.54			7.17	3.41721
Cl							0.232	0.0545					0.232	0.0545
NO3							0.0155	0.0125					0.0155	0.0125
PO4							0.0045	0.006					0.0045	0.006
SO4							0.018	0.009					0.018	0.009
Na							0.0055	0.0045					0.0055	0.0045
NH4							0.0035	0.0035					0.0035	0.0035
K							0.226	0.053					0.226	0.053
Mg							0.016	0.007					0.016	0.007
Ca							0.0205	0.0175					0.0205	0.0175
Emission Factors (EF) are in g compound/kg biomass burned
All uncertainty headings are colored in green
Specific EF or uncertainties with additional notes have been colored and referenced under the corresponding column superscript.
aSource is Christian et al. [2003].
Carbon mass balance (CMB) method used to calculate EF found in Yokelson et al. [1999]
All EFs are calculated from fire-averaged ER relative to CO2. The ER are estimated from the slope of species X vs. CO or CO2.
EF(glycolaldehyde) was renormalized given updated spectral analysis (see Johnson et al., 2010).
bUncertainty in EF measurements from Christian et al. [2003] is ± 37%.
The average uncertainty for NMOC field measurements (Yokelson et al., 2003) suggests a naturally occurring variability of 31%. (See additional calculations spreadsheet)
In Christian et al. [2003] error in lab data was taken as 20%, from a 15% average error in prediction in addition to a 5% error in measurement. The square root of the sum of the squares factoring
in these two sources of error was calculated as 37%, which is the uncertainty used for estimated lab data shown above. See additional calcs.
cSource is Yokelson et al. [2003].
d1σ standard deviation reported in Yokelson et al. [2003].
eSource is Sinha et al. [2003].
EF(PM4) is shown in this work as PM2.5(PM1-PM5).
fUncertainty in EF reported in Sinha et al. [2003] (1σ standard deviation)
gSource is Ferek et al. [1998]. See additional calcs speadsheet for conversion of gC/kgC burned to gX/kg fuel burned.
From looking at the vegetation map we determined that 3 fires in question (labeled CRD) were in fact savanna fires.
EF(PM4) is shown in this work as PM2.5(PM1-PM5).
h1σ standard deviation calculated, see additional calcs.
iEF at average MCE from Yokelson et al. [2011], Table 5. Eight early dry season savanna fires were measured in Mexico.
jUncertainty cited in Yokelson et al. [2011] as the standard deviation.
kEF from Christian et al. [2003]. Data collected by OP-FTIR and PTR-MS.
EF for methanol was averaged from data collected by the OP-FTIR and PTR-MS given the accuracy of both instruments. Uncertainty was taken as the absolute value in the range.
While data from two instruments was obtained, only EF from OP-FTIR data is shown above.
We show EF(acetol) measured by the PTR-MS, for reasons detailed in the FTIR/PTR-MS intercomparison study by Christian et al. [2004].
EF(glycolaldehyde) was renormalized given updated spectral analysis (see Johnson et al., 2010).
Acetol reported a range of EF. The avg. was taken
lUncertainty cited in Christian et al. [2003].
mAverage savanna and grass EF from all sources
"PM2.5" was taken as the average of EF(PM1-PM5).
"Xylenes" EF taken as the sum of o-,m-, and p-xylene EF.
EF(HONO) estimated from the mass HONO/NOx ER reported by Trentmann et al. [2005].
NMOC (identified) summed from weighted averages (column L)
NMOC (identified + unidentified) estimated as 2x NMOC (identified) EF.
nUncertainty calculated as the average standard deviation.

## Sheet: S2.Boreal Forest 
Table S2. Emission factors for boreal fires
	Ground		Ground		Ground		Ground	Ground		Ground Avg		Airborne		Airborne		Airborne		Airborne		Airborne Avg		Total Avg (50/50 ground/air)
	Boreal Organic Soil from Bertschi et al. [2003b]a	Boreal Organic Soil Uncertaintyb	Boreal Organic Soil from Yokelson et al. [1997]c	Boreal Organic Soil Uncertaintyd	Woody/Down/Dead from Bertschi et al. [2003b]e	Woody/Down/Dead Uncertaintyf	Boreal Alaskan Duff from Burling et al. [2010]g	Boreal Peat from Yokelson et al. [1997]h	Boreal Peat Uncertaintyi	Boreal Ground Averagej	Boreal Ground Uncertaintyk	Boreal Forest from Goode at al. [2000]l	Boreal Forest Uncertaintym	Boreal Forest from Nance at al. [1993]n	Boreal Forest Uncertaintyo	Boreal Forest Radke et al. (1991)p	Boreal Forest Uncertaintyq	Boreal Forest Simpson et al. (2011)r	Boreal Forest Uncertaintys	Boreal Airborne Averaget	Boreal Airborne Uncertaintyu	Boreal TOTAL Averagev	Boreal TOTAL Uncertaintyw
Carbon Dioxide (CO2)	1455	16	1093	176	1541	143	1219	1395	52	1340.6	127.27	1667	19	1640	25	1630	103	1616	180	1638.25	106.051	1489.42	121.016
Carbon Monoxide (CO)	143	22.4	137	29	131.7	46	162	209	68	156.54	42.6696	91.4	8.49	81	12	101	52	113	72	96.6	40.4577	126.57	44.7231
Methane (CH4)	7.59	2.46	6.21	2.1	11.77	8.77	9.6	6.85	5.66	8.404	5.07266	2.85	0.53	2.6	1	3.88	1.73	4.7	2.9	3.5075	1.53093	5.95575	3.13694
Nitric Oxide (NO)							0.738			0.738		1.54	0.14					0.29	0.03	0.915	0.0891034	0.8265	0.0804852
Nitrogen Dioxide (NO2)							0.232			0.232								1.03	0.13	1.03	0.13	0.631	0.0796408
Nitrogen Oxides (NOx as NO)							0.89			0.89				1.03	0.14	0.73	0.79	0.962		0.907333	0.699769	0.898667	0.693085
Nitrous Oxide (N2O)														0.14	0.08	0.27	0.23			0.205	0.148691	0.4141
Ethylene (C2H4)	1.44	0.44	1.21	0.28	1.94	0.83	1.73	1.37	0.51	1.538	0.526377	1.8	0.62					0.82	0.09	1.31	0.334869	1.424	0.43013
1-Butene (C4H8)																		0.077	0.009	0.077	0.009	0.15554
i-Butene (C4H8)																		0.056	0.007	0.056	0.007	0.11312
trans-2-Butene (C4H8)																		0.02	0.003	0.02	0.003	0.0404
cis-2-Butene (C4H8)																		0.015	0.002	0.015	0.002	0.0303
1,3-Butadiene (C4H6)																		0.07	0.008	0.07	0.008	0.1414
Propane (C3H8)														0.23	0.17	0.19	0.11	0.23	0.05	0.216667	0.120554	0.437667
Acetic Acid (CH3COOH)	5.35	2.43	5.9	2.54	4.17	5.14	9.28	7.29	4.89	6.398	4.91536	2.42	0.9							2.42	0.9	4.409	2.66105
Formaldehyde (HCHO)	2	1.52	1.17	0.7	1.33	1.18	2.28	1.99	2.67	1.754	1.64607	1.85	0.38					2.1	0.2	1.975	0.38	1.8645	1.26301
Methanol (CH3OH)	3.76	1.68	3.03	1.09	6.75	8.1	4.07	4.04	3.43	4.33	3.41622	1.41	0.17					1.2	0.3	1.305	0.25612	2.8175	1.61974
Ethanol (CH3CH2OH)																		0.027	0.029	0.027	0.029	0.05454
Hydrogen Cyanide (HCN)	1.48	0.46	1.99	0.64	0.47		1.74	5.09	5.64	2.154	1.48601							0.89	0.29	0.89	0.29	1.522	0.821114
Ammonia (NH3)	5.98	2.65	4.91	2.81	1.36	1.65	3.41	8.76	13.76	4.884	5.15903	0.93	0.49	0.64	0.31	0.1	0.07			0.556667	0.321749	2.72033	2.31618
Formic Acid (HCOOH)	0.78	0.68	0.41	0.25	0.37	0.37	0.92	0.89	1.5	0.674	0.751471	0.47	0.12							0.47	0.12	0.572	0.462628
Acetylene (C2H2)			0.11	0.07	0.16	0.15	0.112	0.1	0	0.1205	0.078829	0.23	0.05	0.26	0.07	0.28	0.18	0.22	0.09	0.2475	0.103564	0.184	0.101036
Propyne (C3H4)																		0.029	0.0125	0.029	0.0125	0.05858
Acetone (C3H6O)																		0.37	0.1	0.37	0.1	0.7474
Butane (C4H10)																0.04	0.05	0.076	0.0148	0.058	0.0518836	0.11716
i-Butane (C4H10)																		0.021	0.004	0.021	0.004	0.04242
i-Pentane (C5H12)																		0.019	0.005	0.019	0.005	0.03838
n-Pentane (C5H12)																		0.042	0.008	0.042	0.008	0.08484
2+3-Methylpentane (C6H14)																		0.018	0.004	0.018	0.004	0.03636
n-Hexane (C6H14)																		0.027	0.006	0.027	0.006	0.05454
n-Heptane (C7H16)																		0.024	0.004	0.024	0.004	0.04848
Methyl Ethyl Ketone (C4H8O)																		0.11	0.03	0.11	0.03	0.2222
Methyl Vinyl Ketone (C4H6O)																		0.097	0.0119	0.097	0.0119	0.19594
Phenol (C6H5OH)	3.2	1.42	2.34	2.21	3.4	2.76		7.99	13.03	4.2325	4.44278											2.96275
Toluene (C6H5CH3)																		0.24	0.06	0.24	0.06	0.4848
Glycolaldehyde (C2H4O2)	1.0105	1.075	1.2255	1.0105	0.516	0.7955		1.6555	2.6445	1.10187	1.43032											0.771312
Propylene (C3H6)	1.18	0.6	1.85	0.28	1.44	1.82	1.4	2.79	0.44	1.732	1.19487			0.51	0.18	0.69	0.26	0.38	0.04	0.526667	0.160218	1.12933	0.602095
Ethane (C2H6)	2.84	2.08			3.19	2.46				3.015	2.26736			0.66	0.35	0.5	0.31	0.56	0.13	0.573333	0.28078	1.79417	1.13854
Furan (C4H4O)	1.29	0.36			1.42	1.18	1.25			1.32	0.818196							0.28	0.03	0.28	0.03	0.8	0.495877
Benzene (C6H6)																		0.55	0.11	0.55	0.11	1.111
Ethylchloride (C2H5Cl)																		0.00037	0.00035	0.00037	0.00035	0.0007474
Ethylbenzene (C8H10)																		0.025	0.009	0.025	0.009	0.0505
n-Propylbenzene (C9H12)																		0.0089	0.0042	0.0089	0.0042	0.017978
m+p-Xylene (C8H10)																		0.06	0.008	0.06	0.008	0.1212
o-Xylene (C8H10)																		0.027	0.003	0.027	0.003	0.05454
Xylenes (C8H10)																						0.17574
α-Pinene (C10H16)																		0.81	0.1	0.81	0.1	1.6362
β-Pinene (C10H16)																		0.72	0.09	0.72	0.09	1.4544
Acetonitrile (CH3CN)																		0.3	0.06	0.3	0.06	0.606
Carbonyl Sulfide (OCS)			0.16	0.13				1.63	3.01	0.895	1.27678							0.029	0.007	0.029	0.007	0.462	0.47266
Dimethyl Sulfide (C2H6S)																		0.0023	0.0012	0.0023	0.0012	0.004646
Chloromethane (CH3Cl)																		0.029	0.007	0.029	0.007	0.05858
1,2-Dichloroethane (C2H4Cl2)																		0.00064	0.00051	0.00064	0.00051	0.0012928
Dibromomethane (CH2Br2)																		4.1e-05	8e-05	4.1e-05	8e-05	8.282e-05
Methyl Bromide (CH3Br)																		0.0018	0.0005	0.0018	0.0005	0.003636
Methyl Iodide (CH3I)																		0.00039	9e-05	0.00039	9e-05	0.0007878
Methyl Nitrate (CH3ONO2)																		0.0014	0.0009	0.0014	0.0009	0.002828
2-Butyl Nitrate (C4H9NO3)																		0.0019	0.0012	0.0019	0.0012	0.003838
Ethyl Nitrate (C2H5NO3)																		0.00088	0.00045	0.00088	0.00045	0.0017776
i-Propyl Nitrate (C3H7NO3)																		0.0016	0.001	0.0016	0.001	0.003232
n-Propyl Nitrate (C3H7NO3)																		0.00016	0.00012	0.00016	0.00012	0.0003232
3-Pentyl Nitrate (C5H11NO3)																		0.00036	0.00017	0.00036	0.00017	0.0007272
2-Pentyl Nitrate (C5H11NO3)																		0.00048	0.00031	0.00048	0.00031	0.0009696
3-Methyl-2-Butyl Nitrate (C5H11NO3)																		0.00057	0.00046	0.00057	0.00046	0.0011514
Isoprene (C5H8)																		0.074	0.017	0.074	0.017	0.14948
Methacrolein (C4H6O)																		0.043	0.005	0.043	0.005	0.08686
3-Ethyltoluene (C9H12)																		0.012	0.002	0.012	0.002	0.02424
2-Ethyltoluene (C9H12)																		0.0052	0.0009	0.0052	0.0009	0.010504
4-Ethyltoluene (C9H12)																		0.0074	0.0013	0.0074	0.0013	0.014948
1,2,3-Trimethylbenzene (C9H12)																		0.025	0.003	0.025	0.003	0.0505
1,2,4-Trimethylbenzene (C9H12)																		0.015	0.002	0.015	0.002	0.0303
1,3,5-Trimethylbenzene (C9H12)																		0.0029	0.0005	0.0029	0.0005	0.005858
NMOC (identified)																						29.3258	10.0679
NMOC (identified + unidentified)																						58.6515
PM2.5	10.97	4.26			15.76					13.365	5.19005
PM3.5														21.5	4.8	13.1	6.3			17.3	6.48604
PM2.5 (PM1-PM5)										13.365	5.19005			21.5	4.8	13.1	6.3			17.3	6.48604	15.3325	5.85215
Updated Emission Factors (EF) in g compound/kg biomass burned
All uncertainty headings are colored in green.
Specific EF or uncertainties with additional notes have been colored and referenced under the corresponding column superscript.
aSource is Bertschi et al. [2003b]
As seen in Table 2, EF from 5 fires of organic soil were measured, see additional calculations sheet (Lolo 1, 2, 3, NWT 1, 2)
Average EF was calculated.
EF(glycolaldehyde) was renormalized given updated spectral analysis (see Johnson et al., 2010).
bUncertainty calculated as the standard deviation of EF from relavent fires (Lolo 1, 2, 3, NWT 1, 2). See additional calcs.
cSource is Yokelson et al. [1997], Table 1.
EF from boreal organic soil samples (sedge, spagnum moss, feather moss, white spruce, and forest floor) in Table 1 were reported as molar ratios x 100. These values were converted
to EF using the %C content cited for each fuel type. An average EF and standard deviation of all calculated EF for the different veg. types was obtained.
See additional calcs.
EF(glycolaldehyde) was renormalized given updated spectral analysis (see Johnson et al., 2010).
dUncertainty was calculated as the standard deviation of EF.
eWoody/down/dead data from Bertschi et al. [2003b], Table 2. Only data from "Stump" and "Cwd 2" were averaged, see additional calcs.
EF(glycolaldehyde) was renormalized given updated spectral analysis (see Johnson et al., 2010).
fUncertainty calculated as the range of the two fire measurements. Additional calcs.
gSource is Burling et al. [2010], boreal Alaskan duff from Tables 2a and 2b. Laboratory study
hSource is Yokelson et al. [1997], Table 1.
EF from peat samples from AK and MN in Table 1 were reported as molar ratios x 100. These values were converted
to EF using the %C content cited for each fuel type. %C was not measured in the Alaska peat sample so the %C from MN measurements was used. An average EF
for the 2 samples was obtained. See Additional calcs.
EF(glycolaldehyde) was renormalized given updated spectral analysis (see Johnson et al., 2010).
iUncertainty was calculated in additional calculations as the range of EF of the 2 peat fires.
jBoreal groundbased average computed from data from columns B, D, F, H, and I.
kAvg uncertainty calculated as the avg stdev.
lSource is Goode et al. [2000].
Emission factors were averaged from Tables 2, 3, and 4 from Flights B280, B349, and B309, respectively. (Flight B320 was omitted as it was burned grassland and not representative of a boreal forest)
mUncertainty calculated as the standard deviation of EF from Flights B280, B349, and B309.
nSource is Nance et al. [1993].
EF from Table 2.
One Alaskan wildire measured.
oUncertainty cited in Table 2.
pSource is Radke et al. [1991]. See additional calcs. EF of 4 boreal forest fires were averaged.
qAvg uncertainty calculated as the avg stdev. When only one unc reported, the fractional uncertainty in the reported measurement was taken.
rSource is Simpson et al. [2011].
Emission factors for long-lived species were calculated from 5 plume passes on Flight 17, 18, and 19 during summer 2008
over central Canada. For short-lived species, only data from Flight 18 on July 1 collected < 5 mi from the fire source was used.
NOx as NO calculated from 0.29+ 1.03*(30/46)=0.962
sUncertainty calculated as the total std dev.
tAirborne boreal average computed from data from columns M, O, Q, and S.
uAvg uncertainty calculated as the avg stdev. When only one unc reported, the fractional uncertainty in this measurement was
multiplied by the average EF. When only two measurements given with no uncertainty, the absolute value in the range was taken.
vBoreal total average computed as a 50/50 flaming/smoldering average of groundbased and airborne data (columns L and V)
"Xylenes" EF taken as the sum of o-,m-, and p-xylene EF.
"PM2.5" was taken as the average of EF(PM1-PM5)
When only ground EF available, these EF were multiplied by the average ratio of total/ground (0.70) for compounds which we have both airborne and groundbased measurements.
See additional calculations.
When only air EF available, these EF were multiplied by the average ratio of total/air (2.02) for compounds which we have both airborne and groundbased measurements.
See additional calculations.
Total NMOC were calculated from summing appropriate species in column R. NMOC were not calculated on a study-by-study basis since # species measured
varied greatly (ie. Nance et al. only measured 4 NMOC)
NMOC (identified + unidentified) estimated as 2x NMOC (identified) EF.
wAvg uncertainty calculated as the avg stdev.

## Sheet: S3. Tropical Forest
Table S3. Emission factors for tropical forest fires
	Tropical Evergreen Deforestion						Tropical Dry									Tropical Forest (final avg)
							Tropical Dry Deforestation						Understory
	Tropical Evergreen Deforestation from Yokelson et al. [2008]a	Tropical Evergreen Deforestation uncertaintyb	Tropical Evergreen Deforestation from Ferek et al. [1998]c	Tropical Evergreen Deforestation uncertaintyd	Tropical Evergreen Deforestation Average (B+D)e	Tropical Evergreen Deforestation Average Uncertaintyf	Tropical Dry Deforestation from Yokelson et al. [2011]g	Tropical Dry Deforestation uncertaintyh	Tropical Dry Deforestation from Ferek et al. [1998]i	Tropical Dry Deforestation uncertaintyj	Tropical Dry Deforestation Averagek	Tropical Dry Deforestation uncertaintyl	Tropical Dry Understory from Sinha et al. [2004]m	Tropical Dry Average (H+J+N)n	Tropical Dry Average uncertaintyo	Tropical Forest Average (weighted equally: B+D+H+N+J)p	Tropical Forest Average (All Types) uncertaintyq
Carbon Dioxide (CO2)	1601	40	1601	95	1601	72.8869	1657	39	1652	30	1654.5	34.7789	1705	1671.33	35.1327	1643.2	58.2639
Carbon Monoxide (CO)	107.8	23.78	105	45	106.4	36.2647	87.13	18.2	91.4	23.9	89.265	21.1247	73	83.8433	19.8417	92.866	27.2472
Hydrogen (H2)	3.8				3.8		2.91	1.13			2.91	1.13		2.91	1.13	3.355	1.3028
Methane (CH4)	6.25	1.38	6.63	3.75	6.44	2.76496	5.68	2.09	5.41	1.75	5.545	1.92096	1.4	4.16333	1.44231	5.074	1.97934
Nitric Oxide (NO)			0.25	0.18	0.25	0.18	2.31	1.23	0.14	0.11	1.225	0.822151		1.225	0.822151	0.9	0.619034
Nitrogen Dioxide (NO2)							3.55	1.64			3.55	1.64		3.55	1.64	3.55	1.64
Nitrogen Oxides (NOx as NO)	1.7	1.359	1.18	0.52	1.44	0.929473	4.63	1.93	1.74	0.76	3.185	1.35977	3.5	3.29	1.4046	2.55	1.39541
Nitrous Acid (HONO)							2.15									1.18
Ethylene (C2H4)	0.98	0.332	1.63	0.83	1.305	0.56437	0.97	0.3	1.28	0.14	1.125	0.260961	0.43	0.893333	0.207223	1.058	0.36714
Acetic Acid (CH3COOH)	4.25	0.436			4.25	0.436	2.71	1.1			2.71	1.1	2.2	2.455	0.996494	3.05333	0.903917
Formaldehyde (HCHO)	1.67	0.286			1.67	0.286	2.77	2.726			2.77	2.726	0.75	1.76	1.73204	1.73	1.22196
Methanol (CH3OH)	2.95	0.445			2.95	0.445	3.35	1.48			3.35	1.48	1	2.175	0.960896	2.43333	0.803248
Sulfur Dioxide (SO2)			0.43	0.22	0.43	0.22			0.56	0.25	0.56	0.25	0.22	0.39	0.174107	0.403333	0.193655
Hydrogen Cyanide (HCN)	0.66	0.555			0.66	0.555	0.24	0.065			0.24	0.065	0.37	0.305	0.0826042	0.423333	0.264453
Ammonia (NH3)	1.1	0.46			1.1	0.46	2.48	3.03			2.48	3.03	0.4	1.44	1.75935	1.32667	1.21142
Acetaldehyde (CH3CHO)	1.55	0.745			1.55	0.745										1.55	0.745
Formic Acid (HCOOH)	0.271429	0.228095			0.271429	0.228095	1.82				1.82		0.271429	1.04571	1.54857	0.787619	0.661876
Acetylene (C2H2)	0.27	0.317	0.36	0.22	0.315	0.294816	1.14		0.26	0.1	0.7	0.269231	0.16	0.52	0.2	0.438	0.348555
Phenol (C6H5OH)	0.45	0.088			0.45	0.088										0.45	0.088
Acetol (C3H6O2)	1.13	0.12			1.13	0.12										1.13	0.12
Glycolaldehyde (C2H4O2)	2.838				2.838											2.838
Propylene (C3H6)	0.5	0.19	0.71	0.34	0.605	0.261525	1.26	1.471	0.54	0.13	0.9	0.758599	0.17	0.656667	0.553496	0.636	0.426006
Ethane (C2H6)	1.01	0.341	0.68	0.37	0.845	0.382615	1.19	0.4	0.47	0.16	0.83	0.280778	0.19	0.616667	0.20861	0.708	0.282963
Furan (C4H4O)	0.41	0.098			0.41	0.098										0.41	0.098
Acetone (C3H6O)	0.63	0.167			0.63	0.167										0.63	0.167
Acetonitrile (CH3CN)	0.41	0.101			0.41	0.101										0.41	0.101
Benzene (C6H6)	0.3	0.131	0.67	0.37	0.485	0.241442			0.44	0.03	0.44	0.03	0.13	0.285	0.0194318	0.385	0.157222
Toluene (C6H5CH3)	0.22	0.123	0.38	0.22	0.3	0.170732			0.29	0.09	0.29	0.09	0.15	0.22	0.0682759	0.26	0.129486
Chloromethane(CH3Cl)			0.09	0.08	0.09	0.08			0.04	0.02	0.04	0.02	0.029	0.0345	0.01725	0.053	0.0382211
Trichloromethane (CHCl3)			0.000556	0.000321	0.000556	0.000321			3.14e-05	0.00102	3.14e-05	0.00102		3.14e-05	0.00102	0.0002937	0.00674727
Propadiene (C3H4)			0.0162	0.0082	0.0162	0.0082			0.0161	0.0044	0.0161	0.0044		0.0161	0.0044	0.01615	0.00656909
Propane (C3H8)			0.2	0.11	0.2	0.11			0.13	0.05	0.13	0.05	0.048	0.089	0.0342308	0.126	0.0597955
1,3 Butadiene (C4H6)													0.039	0.039		0.039
1-Butene (C4H8)	0.02		0.14	0.06	0.08	0.0342857			0.12	0.01	0.12	0.01	0.034	0.077	0.00641667	0.0785	0.0242346
Propanenitrile (C3H5N)	0.09				0.09											0.09
Propenenitrile (C3H3N)	0.04	0.014			0.04	0.014										0.04	0.014
Acrolein (C3H4O)	0.65	0.232			0.65	0.232										0.65	0.232
Propanal (C3H6O)	0.1	0.026			0.1	0.026										0.1	0.026
Pyrrole (C4H5N)	0.12	0.038			0.12	0.038										0.12	0.038
Isoprene (C5H8)	0.42	0.112	0.02	0.01	0.22	0.0881526			0.02	0.01	0.02	0.01	0.053	0.0365	0.01825	0.12825	0.0559573
Methyl Vinyl Ketone (C4H6O)	0.39	0.113			0.39	0.113										0.39	0.113
Methacrolein (C4H6O)	0.15	0.045			0.15	0.045										0.15	0.045
Crotonaldehyde (C4H6O)	0.24	0.068			0.24	0.068										0.24	0.068
Methyl Ethyl Ketone (MEK, C4H8O)	0.5	0.213			0.5	0.213										0.5	0.213
Methyl Propanal (C4H8O)	0.18	0.075			0.18	0.075										0.18	0.075
C6 Carbonyls	0.24	0.109			0.24	0.109										0.24	0.109
3-Methylfuran (C5H6O)	0.59	0.196			0.59	0.196										0.59	0.196
2-Methylfuran (C5H6O)	0.08	0.028			0.08	0.028										0.08	0.028
Hexanal (C6H12O)	0.01	0.005			0.01	0.005										0.01	0.005
2,3-Butanedione (C4H6O2)	0.73	0.219			0.73	0.219										0.73	0.219
2-Pentanone (C5H10O)	0.08	0.024			0.08	0.024										0.08	0.024
3-Pentanone (C5H10O)	0.03	0.011			0.03	0.011										0.03	0.011
Other substituted furans	1.21	0.016			1.21	0.016										1.21	0.016
Furaldehydes	0.29	0.001			0.29	0.001										0.29	0.001
m-Xylene (C8H10)			0.05	0.03	0.05	0.03			0.03	0.03
p-Xylene (C8H10)			0.03	0.02	0.03	0.02			0.02	0.02
o-Xylene (C8H10)			0.03	0.02	0.03	0.02			0.02	0.02
Xylenes (C8H10)	0.14	0.083	0.11	0.0709731	0.125	0.0774484			0.07	0.07	0.07	0.07		0.07	0.07	0.106667	0.0818807
Ethylbenzene (C8H10)	0.08	0.033	0.05	0.03	0.065	0.0334657			0.02	0.02	0.02	0.02		0.02	0.02	0.05	0.035709
Carbonyl Sulfide (OCS)	0.0247				0.0247											0.0247
Dimethyl Sulfide (C2H6S)	0.0022				0.0022								0.00049	0.00049		0.001345	0.00171
Dichlorodifluoromethane (CCl2F2)	0.0028				0.0028											0.0028
Methyl Nitrate (MeONO2)	0.0163				0.0163								0.00028	0.00028		0.00829	0.01602
Ethyl Nitrate (EtONO2)	0.0057				0.0057											0.0057
i-Propyl Nitrate (PrONO2)	0.001				0.001											0.001
n-Propyl Nitrate (PrONO2)	0.0003				0.0003											0.0003
2-Butyl Nitrate (BuONO2)	0.0006				0.0006											0.0006
i-Butane (C4H10)			0.02	0.01	0.02	0.01			0.01	0.01	0.01	0.01	0.004	0.007	0.007	0.0113333	0.00895979
n-Butane (C4H10)			0.05	0.03	0.05	0.03			0.05	0.03	0.05	0.03	0.013	0.0315	0.0189	0.0376667	0.0226
trans-2-Butene (C4H8)	0.0161		0.05	0.03	0.03305	0.01983			0.04	0.01	0.04	0.01	0.01	0.025	0.00625	0.029025	0.0133405
cis-2-Butene (C4H8)	0.0202		0.04	0.02	0.0301	0.01505			0.03	0.01	0.03	0.01	0.0072	0.0186	0.0062	0.02435	0.0103468
i-Butene (C4H8)			0.13	0.08	0.13	0.08			0.09	0.02	0.09	0.02		0.09	0.02	0.11	0.050891
Methyl Bromide (CH3Br)			0.00526	0.00353	0.00353	0.00353			0.00275	0.0027	0.00275	0.0027	0.00048	0.001615	0.00158564	0.00283	0.00237985
Methyl Iodide (CH3I)			0.00671	0.00925	0.00925	0.00925			0.00071	0.00098	0.00071	0.00098	8.4e-05	0.000397	0.000547972	0.00250133	0.00345037
i-Pentane (C5H12)			0.01	0.01	0.01	0.01			0.02	0.02	0.02	0.02	0.0011	0.01055	0.01055	0.0103667	0.0103667
n-Pentane (C5H12)			0.01	0.01	0.01	0.01			0.01	0.01	0.01	0.01	0.0041	0.00705	0.00705	0.00803333	0.00803333
3-Methyl-1-Butene (C5H10)													0.0038	0.0038		0.0038
trans-2-Pentene (C5H10)													0.0033	0.0033		0.0033
2-Methyl-2-Butene (C5H10)													0.004	0.004		0.004
2-Methyl-1-Butene (C5H10)													0.0044	0.0044		0.0044
cis-2-Pentene (C5H10)													0.0019	0.0019		0.0019
n-Hexane (C6H14)													0.0101	0.0101		0.0101
2-Methyl-1-Pentene (C6H12)													0.0028	0.0028		0.0028
Heptane (C7H16)													0.0056	0.0056		0.0056
NMOC (identified)																25.9652	8.77603
NMOC (identified + unidentified)																51.9304
TSP (Total PM)													13	13		13
PM2.5	14.8				14.8		4.91	1.64			4.91	1.64		4.91	1.64	9.855	3.29169
PM4			10.92	5.12	10.92	5.12			5.79	2.34	5.79	2.34		5.79	2.34	8.355	3.65701
PM2.5 (PM1-PM5)																9.105	3.5448
PM10	18.5	4.121			18.5	4.121										18.5	4.121
Total Particulate Carbon			7.43	4.12	7.43	4.12			4.79		4.79		3.5	4.145	1.29	5.24	2.90563
CN (particles 0.003-3 µm diameter)													5.9e+16	5.9e+16		5.9e+16
OC			6.79	3.93	6.79	3.93			4.34		4.34		3	3.67	1.34	4.71	2.72611
BC			0.64	0.34	0.64	0.34			0.46		0.46		0.47	0.465	0.01	0.523333	0.278021
Oxylate (C2O4)			0.06	0.04	0.06	0.04			0.02	0.02	0.02	0.02		0.02	0.02	0.04	0.0339935
Cl			0.11	0.13	0.11	0.13			0.07	0.07	0.07	0.07	0.26	0.165	0.165	0.146667	0.160555
NO3			0.07	0.04	0.07	0.04			0.08	0.02	0.08	0.02	0.19	0.135	0.03375	0.113333	0.0499844
PO4			0.00556	0.00899	0.00556	0.00899										0.00556	0.00899
SO4			0.21	0.15	0.21	0.15			0.05	0.03	0.05	0.03	0.14	0.095	0.057	0.133333	0.0879497
Na			0.011	0.011	0.011	0.011			0.00173	0.00119	0.00173	0.00119		0.00173	0.00119	0.006365	0.0054627
NH4			0.01	0.04	0.01	0.04			0.00128	0.00203	0.00128	0.00203		0.00128	0.00203	0.00564	0.0171604
Ca			0.11	0.12	0.11	0.12			0.06	0.06	0.06	0.06		0.06	0.06	0.085	0.0889476
Mg			0.05	0.05	0.05	0.05			0.03	0.02	0.03	0.02		0.03	0.02	0.04	0.0339935
K			0.33	0.32	0.33	0.32			0.17	0.16	0.17	0.16	0.38	0.275	0.258824	0.293333	0.280293
Emission Factors (EF) in g compound/kg biomass burned
All uncertainty headings are colored in green.
Specific EF or uncertainties with additional notes have been colored and referenced under the corresponding column superscript.
aSource is Table 4 in Yokelson et al. [2008].
Measurements reported assuming 5% of ground average and 95% of airborne average unless otherwise stated (ground data from Christian et al., 2007 and air data from Yokelson et al., 2007).
EF for species with no ground data were computed from 1.12 times the air average (reported in Yokelson et al., 2008).
Data source is Andreae and Merlet [2001].
EF of pyrrole found in Atmos. Chem. Phys. Discuss., 7, 6903-6958, 2007
Reported EF is Acetol + methyl acetate.
EF(glycolaldehyde) was renormalized given updated spectral analysis (see Johnson et al., 2010).
bUncertainty from airborne standard deviations from Table 2 of Yokelson et al. [2007].
Uncertainty in measurement of pyrrole found in Atmos. Chem. Phys. Discuss., 7, 6903-6958, 2007
cFerek et al. [1998]. See additional calculations. Data was from the spreadsheet sent by authors (n=12), n=6 flaming and n=6 smoldering. All EF were averaged,
and converted from gC/kgC burned to gX/kg fuel.
Because of negative artifacts that develop when using their technique for analyzing quartz filters on biomass burning aerosols, BC values were adjusted upward by 25% ("BCQM").
dUncertainty calculated as the std deviation of the 12 averaged values.
e Average Tropical Evergreen Deforestion from the two listed sources.
fUncertainty calculated as the avg stdev.
gSource is Yokelson et al. [2011] EF at average MCE, Table 3.
7 tropical dry deforestation fires in the Yucatan lowlands (6 of which were originally presented in Yokelson et al., 2009) and 2 tropical dry understory fires (burning un-slashed vegetation)
sampled in Mexico are presented in Yokelson et al. [2011]. These fires occurred during the early dry season.
EF(HONO) was calculated from HONO/Nox ER from Fire #2, which most likely represents emissions from a TDF fire (in Table 3 of Yokelson et al.,2009).
HONO/NOx = (0.0031+0.0075/2)/0.0179=0.296. 0.296 = (EF(HONO)/4.63)*(30/47), EF(HONO) = 2.15.
hThe uncertainty was taken from Yokelson et al. [2011] as the standard deviation.
iSource is Ferek et al. [1998], from the spreadsheet sent by Jeff Reid. Fires in rows 5, 6,and 7 classified as tropical dry forest. The others in this block were categorized as savanna.
See additional calcs for conversions of units.
Because of negative artifacts that develop when using their technique for analyzing quartz filters on biomass burning aerosols, BC values were adjusted upward by 25% ("BCQM").
jUncertainty calculated as the std deviation of these 3 fires, see additional calcs.
kAverage Tropical Dry Forest, from the two listed sources (columns H,J)
lUncertainty calculated using avg stdev.
mSource is Sinha et al. [2004]. One African tropical dry (Miombo) fire was measured.
CN emission factor (conc of particles 0.003-3 µm diameter) also measured for this fire, reported in units of number of particles/kg fuel burned.
nAverage EF of Tropical Dry Understory and Tropical Dry Deforestion (avg of H+J+N)
oUncertainty calculated using avg stdev (columns H,J,N). When 2 studies report only EF and no unc, the absolute value of the range was taken
pAverage EF of Tropical Evergreen Deforestation, Tropical Dry Deforestation, and Tropical Dry Understory where applicable. (Average of columns B, D, H, J, N).
"PM2.5" was taken as the average of EF(PM1-PM5).
"Xylenes" EF taken as the sum of o-,m-, and p-xylene EF.
Total PM taken as the average of EF(total PM) and EF(PM10).
NMOC taken as the sum of the individual compounds in column Q
NMOC (identified + unidentified) estimated as 2x NMOC (identified) EF.
qUncertainty calculated as the average stdev in measurements of Tropical Evergreen Deforestation, Tropical Dry Deforestation, and Tropical Dry Understory.
(columns B,D,H,J,N). When 2+studies and no error reported, variability was taken as the absolute value of the range
EF(HONO) was calculated assuming an identical HONO/NOx ratio as observed in Yokelson et al. [2011].

## Sheet: S4. Temperate Forest
Table S4. Emission factors for temperate forest fires
			PRELIMINARY DATA
	Field		Field
	Temperate Evergreen from Radke et al. (1991)a	Temperate Evergreen Uncertaintyb	Temperate Evergreen from Burling et al. (in prep)c	Temperate Evergreen Uncertaintyd	Temperate Evergreen from Yokelson et al. (2011)e	Temperate Evergreen Uncertaintyf	Temperate Evergreen Averageg	Temperate Evergreen Avg Uncertaintyh
Carbon Dioxide (CO2)	1641	75.27	1668	72	1602.5	64.35	1637.17	70.6052
Carbon Monoxide (CO)	92.67	39.68	72	26	103	29.336	89.2233	32.3699
Methane (CH4)	3.03	1.51	3.02	2.43	5.7	2.675	3.91667	2.38888
Nitric Oxide (NO)			0.88	0.34	1.604	0.66	1.242	0.495701
Nitrogen Dioxide (NO2)			2.68	0.35	3.195	1.176	2.9375	0.811236
Nitrogen Oxides (NOx as NO)	1.32	0.84	2.55	0.41	3.658	0.936	2.50933	1.02062
Nitrous Oxide (N2O)	0.16	0.21					0.16	0.21
Nitrous Acid (HONO)			0.52	0.15			0.52	0.15
Hydrogen (H2)					2.03	1.79	2.03	1.79
Ethane (C2H6)	0.51	0.25			1.727	1.2	1.1185	0.672545
Ethylene (C2H4)			1.16	0.28	1.07	0.395	1.115	0.34775
Acetylene (C2H2)	0.21	0.07	0.3	0.07	0.358	0.144	0.289333	0.0955747
Propane (C3H8)	0.26	0.11					0.26	0.11
Phenol (C6H5OH)			0.33	0.38			0.33	0.38
Furan (C4H4O)			0.2	0.21			0.2	0.21
Glycolaldehyde (C2H4O2)			0.25	0.45			0.25	0.45
Propylene (C3H6)	0.41	0.11	0.4	0.28	2.052	1.281	0.954	0.537324
Butane (C4H10)	0.083	0.1					0.083	0.1
Methanol (CH3OH)			1.05	0.98	2.814	1.101	1.932	1.38256
Formic Acid (HCOOH)			0.094	0.09	0.615	0.541	0.3545	0.325921
Acetic Acid (CH3COOH)			1.32	1.27	2.61	1.86	1.965	1.66361
Formaldehyde (HCHO)			1.51	0.53	3.032	1.845	2.271	1.12807
Ammonia (NH3)	1.3	0.87	0.5	0.69	0.54	0.541	0.78	0.82498
Hydrogen Cyanide (HCN)			0.59	0.13	0.876	0.256	0.733	0.189698
NMOC (identified)							11.8553	7.59306
NMOC (identified + unidentified)							23.7107
PM2.5			13.55	7.55	11.33	4.13	12.44	5.85699
PM3.5	13.0333	6.58752					13.0333	6.58752
PM2.5 (PM1-PM5)							12.7367	7.52869
Emission Factors (EF) in g compound/kg biomass burned
All uncertainty headings are colored in green.
Specific EF or uncertainties with additional notes have been colored and referenced under the corresponding column superscript.
aSource is Radke et al. [1991], Table 28.4. EF from Myrtle/Fall Creek, Silver, and Mabel Lake fires were included.
Nox was reported as NOx = NO + NO2 in original work. EF were converted to "NOx as NO" by multiplying EF by a factor of (30/38). See additional calcs.
Particulate data from Table 28.2. We only report PM3.5 which calculated EF using weighted filters and is the most simple and most accurate method used for EF(PM) in this study.
bUncertainty taken as a measure of the average stdev, see additional calcs.
cSource is Burling et al. [in preparation], Table 2. Emission factors from 6 North Carolina and 2 California pine fires were averaged at average MCE.
dUncertainty was taken as the standard deviation in all pine fires, from Table 2.
eSource is Yokelson et al. (2011), Table 6 (EF at average MCE).
fThe uncertainty was taken as the stdev as seen in Yokelson et al. (2011), Table 6.
gAverage EF from the three studies was taken.
"PM2.5" was taken as the average of EF(PM1-PM5).
NMOC taken as the sum of appropriate species in col F.
NMOC (identified + unidentified) estimated as 2x NMOC (identified) EF.
hThe uncertainty was taken as the average stdev.

## Sheet: S5. Peatland
Table S5. Emission factors for peatland fires
	Lab	Lab
	Indonesian Peat from Christian et al. [2003]a	Boreal Peat from Yokelson et al. [1997]b	Boreal Peat Uncertaintyc	Peat Averaged	Peat Average Uncertaintye	Tropical Evergreen Deforestation Averagef	Tropical Evergreen Deforestation Average Uncertaintyg	Peatland Averageh	Peatland Average Uncertaintyi
Carbon Dioxide (CO2)	1703	1395	52	1549	57.7405	1601	73	1563.04	65.0921
Carbon Monoxide (CO)	210.3	209	68	209.65	68.2115	106	36	181.665	60.4157
Methane (CH4)	20.8	6.85	5.66	13.825	11.4233	6.44	2.76	11.831	7.78699
Nitric Oxide (NO)	1			1		0.25	0.18	0.7975	0.5742
Ethylene (C2H4)	2.57	1.37	0.51	1.97	0.733358	1.31	0.56	1.7918	0.718196
Acetic Acid (CH3COOH)	8.97	7.29	4.89	8.13	5.45346	4.25	0.44	7.0824	3.39906
Formaldehyde (HCHO)	1.4	1.99	2.67	1.695	2.2742	1.67	0.29	1.68825	1.61505
Methanol (CH3OH)	8.46	4.04	3.43	6.25	5.30631	2.95	0.45	5.359	3.26874
Hydrogen Cyanide (HCN)	8.11	5.09	5.64	6.6	7.31316	0.66	0.56	4.9962	4.93046
Ammonia (NH3)	19.92	8.76	13.76	14.34	22.5249	1.1	0.46	10.7652	12.3735
Acetaldehyde (CH3CHO)	3.27			3.27		1.55	0.75	2.8056	1.35755
Formic Acid (HCOOH)	0.37619	0.890476	1.49524	0.633333	1.06346	0.27	0.23	0.535233	0.712602
Acetylene (C2H2)	0.06	0.1	0	0.08	0	0.32	0.29	0.1448	0.0927901
Phenol (C6H5OH)	3.62	7.99	13.03	5.805	9.46673	0.45	0.09	4.35915	5.06438
Acetol (C3H6O2)	2.21			2.21		1.13	0.12	1.9184	0.203724
Glycolaldehyde (C2H4O2)	3.4185	1.6555	2.6445	2.537	4.05261	2.84		2.61881	4.18329
Propylene (C3H6)	3.05	2.79	0.44	2.92	0.460502	0.61	0.26	2.2963	0.737936
Methyl Vinyl Ether (C3H6O)	0.85			0.85				0.85
Furan (C4H4O)	1.91			1.91		0.41	0.1	1.505	0.367073
Acetone (C3H6O)	1.25			1.25		0.63	0.17	1.0826	0.29213
Acetonitrile (CH3CN)	4.91			4.91		0.41	0.1	3.695	0.90122
Benzene (C6H6)	3.19			3.19		0.49	0.24	2.461	1.20539
Toluene (C6H5CH3)	1.55			1.55		0.3	0.17	1.2125	0.687083
Isoprene (C5H8)	1.38			1.38		0.22	0.09	1.0668	0.436418
Carbonyl Sulfide (OCS)		1.63	3.01	1.63	3.01	0.025		1.19665	2.20976
NMOC (identified)				58.7703		20.495		48.6655	32.3829
NMOC (identified + unidentified)								97.331
OC	6.02			6.02		6.79	3.93	6.2279	3.60466
BC	0.04			0.04		0.64	0.34	0.202	0.107313
Emission Factors (EF) in g/kg
All uncertainty headings are colored in green.
Specific EF or uncertainties with additional notes have been colored and referenced under the corresponding column superscript.
aSource is Christian et al. [2003] Table 6, single Indonesian peat sample.
Indonesian peat had a fuel C content of 54.7%.
EF(glycolaldehyde) was renormalized given updated spectral analysis (see Johnson et al., 2010).
While data from two instruments was obtained, only EF from OP-FTIR data is shown above.
EF(MeOH) was averaged from data collected by the OP-FTIR and PTR-MS due to the lack of interference for methanol.
We show EF(acetol) measured by the PTR-MS, for reasons detailed in the FTIR/PTR-MS intercomparison study by Christian et al. [2004].
No uncertainty listed as only one fire was measured. A general range of 20-40% can be assumed.
EF(BC) and EF(OC) from Table 2 in original work.
bSource is Yokelson et al. [1997] Table 1.
EF from peat samples from Alaska (AK) and Minnesota (MN) in Table 1 were reported as molar ratios x 100. These values were converted
to EF using the %C content cited for each fuel type. %C was not measured in the Alaska peat sample so the %C from MN
measurements was used. An average EF for the 2 samples was obtained. See additional calcs. This data appears in the Boreal table as well.
EF(glycolaldehyde) was renormalized given updated spectral analysis (see Johnson et al., 2010).
cUncertainty was calculated as the absolute value in the range of EF. See additional calcs.
dEF calculated as the average of the two sources cited.
For a more detailed account of peatlands considering both belowground and aboveground carbon sources, some may desire averaging column E with the
tropical evergreen forest deforestation fire EF from Table S3.
NMOC taken as the sum of appropriate species in col E.
eThe uncertainty was taken as the fractional unc from Yokelson et al. [1997].
fThe EF from tropical evergreen deforestation taken from Table S3.
gUncertainty from tropical evergreen deforestation taken from Table S3.
hA weighted average of peat (column E, weighted 73%) and tropical evergreen deforestation (column G, weighted 27%) was taken to represent the
typical aboveground and belowground carbon distribution of a peatland (Page et al., 2002).
NMOC taken as the sum of appropriate species in col I.
NMOC (identified + unidentified) estimated as 2x NMOC (identified) EF.
iUncertainty was calculated from the average standard deviation.

## Sheet: S6. Chaparral
Table S6. Emission factors of chaparral fires
					PRELIMINARY
	Field		Lab		Field
	Chaparral from Radke et al. [1991]a	Chaparral Uncertaintyb	Chaparral from Burling et al. [2010]c	Chaparral Uncertaintyd	Chaparral from Burling et al. [in prep]e	Chaparral Uncertaintyf	Chaparral Avgg	Chaparral Avg Uncertaintyh
Carbon Dioxide (CO2)	1687.33	32.19	1772	41	1672	43	1710.44	39.0129
Carbon Monoxide (CO)	61	11.82	66.03	6.39	75	20	67.3433	13.3573
Methane (CH4)	2.3	0.32	1.44	0.379	3.78	1.5	2.50667	0.717945
Nitric Oxide (NO)			2.322	0.16	0.72	0.27	1.521	0.410068
Nitrogen Dioxide (NO2)			0.62	0.242	2.2	0.54	1.41	0.459712
Nitrogen Oxides (NOx as NO)	5.11	2.07	2.726	0.3	1.93	0.54	3.25533	0.948138
Nitrous Oxide (N2O)	0.25	0.18					0.25	0.18
Nitrous Acid (HONO)			0.258	0.112	0.56	0.15	0.409	0.147523
Methanol (CH3OH)			0.303	0.112	1.29	0.43	0.7965	0.280331
Formic Acid (HCOOH)			0.064	0.039	0.05	0.04	0.057	0.0405329
Acetic Acid (CH3COOH)			0.56	0.263	1.64	0.73	1.1	0.503301
Formaldehyde (HCHO)			0.353	0.142	1.3	0.21	0.8265	0.253341
Glycolaldehyde (C2H4O2)					0.23	0.2	0.23	0.2
Ethane (C2H6)	0.36	0.11					0.36	0.11
Propane (C3H8)	0.19	0.09					0.19	0.09
Butane (C4H10)	0.14	0.07					0.14	0.07
Ethylene (C2H4)			0.462	0.128	1.03	0.22	0.746	0.184537
Acetylene (C2H2)	0.2	0.04	0.194	0.125	0.22	0.044	0.204667	0.0831495
Propylene (C3H6)	0.43	0.07	0.141	0.055	0.56	0.23	0.377	0.12828
Ammonia (NH3)	0.9	0.41	0.581	0.14	1.61	1.57	1.03033	0.656111
Hydrogen Cyanide (HCN)			0.062	0.015	0.7	0.26	0.381	0.119421
Hydrogen Chloride (HCl)			0.174	0.139			0.174	0.139
Sulfur Dioxide (SO2)			0.681	0.133			0.681	0.133
Furan (C4H4O)			0.076	0.043	0.29	0.16	0.183	0.102261
Phenol (C6H6O)					0.45	0.21	0.45	0.21
NMOC (identified)							6.04167	2.37515
NMOC (identified + unidentified)							12.0833
BC					1.31		1.3
OC					3.7		3.7
PM2	12.57	7.1					12.57	7.1
PM2.5					7.11	1.67	7.11	1.67
PM3.5	15.93	9.26					15.93	9.26
PM2.5 (PM1-PM5)							11.87	5.78314
PM48 (TSP)	15.37	7.24					15.37	7.24
Emission Factors (EF) in g/kg
All uncertainty headings are colored in green.
Specific EF or uncertainties with additional notes have been colored and referenced under the corresponding column superscript.
aSource is Radke et al. [1991] Table 28.4. EF from Lodi 1, Lodi 2, and Eagle fires were included.
NOx was reported as NOx = NO + NO2. EF were converted to "NOx as NO" by multiplying EF by a factor of (30/38). See additional calcs.
Particulate data from Table 28.2.
bUncertainty calculated as the average standard deviation.
cSource is Burling et al. [2010].
6 types of chaparral fuels were measured as part of the SMURFS combustion lab study.
dUncertainty provided by Burling et al. [2010] as the standard deviation.
eSource is Burling et al. [in prep.]. Data collected November 2009 as part of the DoD project.
Data from 5 chaparral fires (see additional calcs.) were averaged, Table 3.
BC and OC EF are from Akagi et al. (in prep).
fUncertainty calculated as the standard deviation in the 5 measurements averaged.
gEF calculated as the average of the 3 sources cited. No weighting of studies was done eventhough field studies depict "real" conditions moreso than lab measurements
"PM2.5" was taken as the average of EF(PM1-PM5).
NMOC taken as the sum of appropriate species in col F.
NMOC (identified + unidentified) estimated as 2x NMOC (identified) EF.
hUncertainty was calculated as the avg. stdev.

## Sheet: S7. Open cooking
Table S7. Emission factors from open cooking fires
	Open Cooking from Bertschi et al. [2003a] Africaa	Open Cooking Uncertaintyb	Open Cooking from Christian et al. [2010] Mexicoc	Open Cooking Uncertaintyd	Open Cooking from Brocard et al. [1996] Africae	Open Cooking Uncertaintyf	Open Cooking from Smith et al. [2000] Indiag	Open Cooking Uncertaintyh	Open Cooking from Roden et al. [2006] Hondurasi	Open Cooking Uncertaintyj	Open Cooking from Roden et al. [2009]k	Open Cooking Uncertaintyl	Open Cooking from Zhang et al. [2000]m	Open Cooking Uncertaintyn	Open Cooking from Johnson et al. [2008]o	Open Cooking Uncertaintyp	Open Cooking Averageq	Open Cooking Uncertaintyr
Carbon Dioxide (CO2)	1525		1724	34	1467	256.7	1455		1644	46	1684	16	1462	69	1424	102	1548.12	125.196
Carbon Monoxide (CO)	96	25	58.4	18.5	70	23	62	8.86	121	29	97.5	11	65.3	28.9	49	29.1	77.4	26.1802
Methane (CH4)	10.6	3.57	3.35	1.06	2	0.8	6.1	4.74					3.39	2.45	3.73	2.34	4.86167	2.73094
Nitric Oxide (NO)	1.72	0.75															1.72	0.75
Nitrogen Dioxide (NO2)	0.49	0.33															0.49	0.33
Nitrogen Oxides (NOx as NO)	2.04	0.82			1.48	0.86							0.75	0.39			1.42333	0.720919
Ethylene (C2H4)	2.35	1.33	0.7	0.16													1.525	0.658186
Acetic Acid (CH3COOH)	8.12	4.97	1.82	1.31													4.97	3.32045
Formaldehyde (HCHO)	3.52	1.42	0.64	0.27													2.08	0.85851
Methanol (CH3OH)	3.61	1.96	0.91	0.53													2.26	1.27243
Ammonia (NH3)	1.29	0.23	0.44	0.28													0.865	0.404219
Formic Acid (HCOOH)	0.32	0.31	0.119048	0.0571429													0.219524	0.167823
Acetylene (C2H2)	1.67		0.27	0.14													0.97	0.502963
Phenol (C6H5OH)	3.32																3.32
Glycolaldehyde (C2H4O2)	1.419																1.419
Propylene (C3H6)	0.95	0.42	0.18	0.13													0.565	0.338308
Ethane (C2H6)	1.5	0.5															1.5	0.5
Furan (C4H4O)	0.4																0.4
TNMHC as CH4															2.89	1.21	2.89	1.21
TNMHC as gC													2.27	2.07			2.27	2.07
NMOC (identified)																	19.2285	7.61867
NMOC (identified + unidentified)																	57.6856
TSP													3.29	1.18	5.8	2.67	4.545	1.53133
PM2.5			6.73	1.61													6.73	1.61
PM4									7.91	2.91	5.2	0.2					6.555	1.71449
PM2.5 (PM1-PM5)																	6.6425	1.66487
OC			2.05	1.08					3.47	1.67	3.12	0.05			2.9	1.35	2.885	1.2292
BC			0.48	0.2					1.17	0.89	0.85	0.3			0.83	0.46	0.8325	0.452924
Emission Factors (EF) in g/kg
All uncertainty headings are colored in green.
Specific EFs with additional notes have been colored and referenced under the corresponding column superscript.
aSource is Bertschi et al. [2003a], Table 1.
EF(glycolaldehyde) was renormalized given updated spectral analysis (see Johnson et al., 2010).
b Uncertainty was calculated factoring in the error in dER/ER and dCO/CO2 (for those compounds reported relative to CO).
No unc for CO2 reported as it was not given in the paper.
For ER reported relative to CO2, uncertainty was simply the fractional unc dER/ER
cFrom Table 3 of Christian et al. [2010]. Average EF from 8 cooking fires was reported.
Total PM reported in Christian et al. [2010] is PM2.5. See Fig. 3 in original work.
Average EF from 5 fires (Table 4) measured in Christian et al. [2010] were calculated, see additional calculations
d Uncertainty cited in Christian et al. [2010].
Average std. deviation from 5 fires (Table 4) measured in Christian et al. [2010] were calculated, see additional calculations
eBrocard et al. [1996] sampled 43 cooking fires in the Ivory Coast. Reported in Bertschi et al. [2003a]
EF from original paper were multiplied by MWx/MWC or MWx/MWN in order to convert units from gC or gN/kg dry wood to gX/kg fuel burned. See additional calculations.
Some values appear slightly different in Brocard et al. [1998]. These values in Table 6 supercede those found in the 1996 paper.
fUncertainties cited in Table 3 of Brocard et al. [1996] were multiplied by MWx/MWC in order to convert units from gC or gN/kg dry wood to gX/kg fuel burned. See additional calculations sheet.
gSmith et al. [2000] sampled 6 cooking fires in a lab in India using local fuel. Reported in Bertschi et al. [2003a]. Still not sure how these numbers evolved from original paper.
hUncertainty from the fractional uncertainty in ER, as cited in Table 1 in Bertschi et al. [2003a]. See additional calcs.
EF(CO) reported relative to CO2 so unc is (dER/ER)*EF.
Uncertainty was calculated factoring in the error in dER/ER and dCO/CO2 (for those compounds reported relative to CO).
iSource is Roden et al. [1996], Table 2. EF avgs were calculated for open cooking fires (as detailed in Table 1), which include tests 1, 4, 5, 8, 11, and 12, which did not have chimneys.
See additional calculations sheet.
CO2 data for Tests 5, 8, 11, and 12 from Ted's spreadsheet were provided by Tami Bond and Christoph Roden. See additional calcs
jUncertainty calculated as the standard deviation of test measurement EF. See additional calculations.
kSource is Roden et al. [2009], supplementary material. EF avgs were calculated for open cooking fires including Tests 114 and 115, labeled "traditional".
CO2 data in spreadsheet "Roden et al 2006_EF" was provided by Tami Bond and Christoph Roden. See additional calcs
lUncertainty calculated as the absolute value in the range in measurements.
mSource is Zhang et al. [2000], Table 4. Specific fuel/stove EF were averaged, see additional calculations.
nUncertainty calculated as the standard deviation of test measurement EF. See additional calculations.
oSource is Johnson et al. [2008] Table 1, only those fires that are labeled "open". Values were converted from gC/kg wood burned to units of gCompound/kg fuel burned.
See additional calculations.
pUncertainty calculated as the standard deviation of test measurement EFs. See additional calculations.
qAverage EF from all cited sources.
"PM2.5" was taken as the average of EF(PM1-PM5).
NMOC calculated as the sum of individual NMOCs
NMOC (identified + unidentified) estimated as 3x NMOC (identified) EF. (See Sect. 3.2)
rUncertainty calculated as the average stdev.

## Sheet: S8. Cooking stoves
Table S8. Emission factors of cooking stove fires
	Patsari Cooking Stove from Christian et al. [2010]a	Patsari Cooking Stove Uncertaintyb	Patsari Cooking Stove from Johnson et al. [2008]c	Patsari Cooking Stove Uncertaintyd	Patsari Cooking Stove Averagee	Patsari Cooking Stove Avg. Uncertaintyf
Carbon Dioxide (CO2)	1771	13	1449	145	1610	114.229
Carbon Monoxide (CO)	35.2	8	48.1	29.2	41.65	19.0906
Methane (CH4)	1.51	0.83	3.12	1.99	2.315	1.3783
Ethylene (C2H4)	0.46	0.12			0.46	0.12
Acetic Acid (CH3COOH)	0.34				0.34
Formaldehyde (HCHO)	0.37	0.4			0.37	0.4
Methanol (CH3OH)	0.39	0.39			0.39	0.39
Ammonia (NH3)	0.03				0.03
Formic Acid (HCOOH)	0.0047619				0.0047619
Acetylene (C2H2)	0.28	0.01			0.28	0.01
Propylene (C3H6)	0.03				0.03
TNMHC as CH4			3.76	4.53	3.76	4.53
NMOC (identified)					1.87476	0.92
NMOC (identified + unidentified)					5.62429
TSP			3.34	1.68	3.34	1.68
BC			0.74	0.37	0.74	0.37
OC			1.92	0.9	1.92	0.9
Emission Factors (EF) in g/kg
All uncertainty headings are colored in green.
Specific EF or uncertainties with additional notes have been colored and referenced under the corresponding column superscript.
aSource is Christian et al. [2010]
26 outdoor sample measurements at the chimney outlet of the same 2 Patsari stoves.
Fire averaged data from fires 1 and 2. See additional calcs.
bUncertainty calculated as the absolute value in the range of measurements from fires 1 and 2. Additional calcs.
cSource is Johnson et al. [2008], Table 1. Only samples from Patsari stoves were included, see additional calculations. Reported EF were avged.
dUncertainty calculated as the standard deviation of measurements from samples. See additional calcs.
eAverage calculated from the two sources shown.
NMOC summed in col F
NMOC (identified + unidentified) estimated as 3x NMOC (identified) EF.
fUncertainty calculated as the average stdev when two uncertainties available.

## Sheet: S9. Charcoal making
Table S9. Emission factors of charcoal making fires
	Charcoal Making Kilns from Bertschi et al. [2003a]a	Charcoal Making Kilns Uncertaintyb	Charcoal Making Kilns from Christian et al. [2010]c	Charcoal Making Kilns Uncertaintyd	Charcoal Making Kilns from Christian et al. [2007]e	Charcoal Making Kilns Uncertaintyf	Charcoal Making Kilns Average (B+D+F)g	Charcoal Making Kilns Avg. Uncertaintyh	Charcoal Making Kilns from Lacaux et al. [1994]i	Charcoal Making Kilns Uncertaintyj	Charcoal Making Kilns from Smith et al. [1999]k	Charcoal Making Kilns Uncertaintyl	Charcoal Making Kilns from Pennise et al. [2001]m	Charcoal Making Kilns Uncertaintyn	Charcoal Making Kilns Averageo	Charcoal Making Kilns Uncertaintyp
Carbon Dioxide (CO2)	1935		2079	82.1	1591.6		1990.38	78.6005	1571	327	1140		1802		1625.85	243.565
Carbon Monoxide (CO)	345	88	303.2	28.6	214.72	20	319.725	53.0639	250	67	226	37	223	43.7	254.681	51.6592
Methane (CH4)	47.7	18.8	39.3	15	155.83	15.9	47.9932	15.4632	38	9.5	27.7	5.97	44.6	15.51	39.5733	11.43
Nitric Oxide (NO)	0.45						0.45						0.057		0.2535	0.393
Nitrogen Oxides (NOx as NO)	0.45						0.45		0.15	0.15			0.063		0.221	0.221
Ethylene (C2H4)	4.6	1.36	2.82	1.18	6.01	0.71	3.802	1.15416							3.802	1.15416
Acetic Acid (CH3COOH)	31.8	24.3	115	54	228.68	127	79.6112	48.4876	10						44.8056	27.2891
Formaldehyde (HCHO)	3.88				0.69	0.46	3.6248	2.41653							3.6248	2.41653
Methanol (CH3OH)	43.8	29.8	69.3	19.6	16.44	3.8	54.9456	27.9177							54.9456	27.9177
Hydrogen Cyanide (HCN)					0.21	0.17	0.21	0.17							0.21	0.17
Ammonia (NH3)	1.33	0.56	0.43	0.25	33.5	38.6	2.1848	1.71242	0.3	0.43					1.2424	1.43516
Formic Acid (HCOOH)	0.719048	0.3	0.561905	0.0333333			0.640476	0.190852	0.71						0.675238	0.201211
Acetylene (C2H2)			0.18		0.6	0.06	0.2136	0.02136							0.2136	0.02136
Phenol (C6H5OH)	10.04	8.21			15.1	5.23	10.4448	6.55882							10.4448	6.55882
Acetol (C3H6O2)					21.56	35.3	21.56	35.3							21.56	35.3
Propylene (C3H6)	5.35	3	3.04	1.07	2.25	0.99	4.1172	1.88962							4.1172	1.88962
Ethane (C2H6)	12.2	9.3					12.2	9.3							12.2	9.3
Furan (C4H4O)	4.19	2.73			1.04	0.53	3.938	2.30335							3.938	2.30335
TSP											0.7-4.2				0.7-4.2
NMOC (identified)															160.537	114.522
NMOC (identified + unidentified)															321.074
OC			0.74	0.72			0.74	0.72							0.74	0.72
BC			0.02	0.02			0.02	0.02							0.02	0.02
Emission Factors (EF) in g/kg charcoal produced
All uncertainty headings are colored in green.
Specific EF or uncertainties with additional notes have been colored and referenced under the corresponding column superscript.
aSource is Bertschi et al. [2003a]
All emission factors are reported as g/kg of charcoal produced. Given charcoal yields reported in Chidumayo [1994], Pennise et al. [2001], Lacaux et al. [1994], and Smith et al. [2000],
an average charcoal yield of 28% was assumed. Thus, EF in g/kg wood were multiplied by a conversion factor of 1000/280 to calculate EF in units of g/kg charcoal produced.
See additional calcs sheet.
1 kiln was measured for 1-2 h on 3 different days (n=3).
bFor ER reported relative to CO, uncertainty was calculated as the total standard dev factoring error in dER/ER and dCO/CO2.
Fractional unc used for those species reported relative to CO2.
Unc for CO2 not shown as none was provided.
cSource is Christian et al. [2010]
Table 6 reports EFs as g/kg wood used. These values were multiplied by 1000g wood/280g charcoal (as explained above) in order to convert units to g/kg charcoal produced.
See additional calculations sheet.
n=3 kilns, 36 spot measurements
EC and OC data from Table 4 of original work.
dUncertainty in EF (g/kg fry fuel) shown in Table 6 of Christian et al. [2010]. See additional calculations for conversion to units of g/kg charcoal.
For EC and OC emission factors, the range of the 2 measurements provided was taken.
eER Data from Table 6 of Christian et al. [2007] converted from ER to EF (g/kg fuel burned), see additional calculations tab.
Spot measurements were made in the late stages of charcoal making and may not represent gas emissions which occur during the whole charcoal making process.
fFor ER reported relative to CO, uncertainty was calculated as the total standard dev factoring error in dER/ER and dCO/CO2.
Fractional unc used for those species reported relative to CO2
Unc for CO2 not shown as no unc was reported in original work.
gAverage EF from our studies (Christian et al. [2007], Bertschi et al. [2003a], and Christian et al. [2010]) was taken. Since the Mexico kilns sampled 36 times @ 1 min (shorter samples but
over a greater period of time), we weighted these EF the same as those from Bertschi (48%). In Brazil only 3 one min spot measurements were taken in Christian et al. [2007].
A weighting factor of 1/12 was used based on minutes of actual sampling (3/36= 1/12), thus Christian et al. [2007] was weighted 4%.
When only Bertschi et al. [2003a] and Christian et al. [2010] values available, a 50/50 weighted avg was taken.
When only Bertschi et al. [2003a] OR Christian et al. [2010] and Christian et al. [2007] were available, the Bertschi or Christian EF was weighted 91%, Christian et al. [2007] weighted 9%.
(factoring in the 1/12 weighting factor)
hUncertainty taken as the average stdev of EF from our studies, unweighted.
iEFs from Lacaux et al. [1994], Table 2. Values as gC/kg of wood were multiplied by MW_species/ MW_carbon to derive EF in units of gCmpd/kg dry wood.
EF were then multiplied by the (1000/280) charcoal yield conversion factor. Had some issues reproducing Bertschi's values shown in Table 3. See additional calcs.
Values recalculated from Bertschi et al. [2003a]
jUncertainty in EF treated the same as in superscript i. Unc values found in Table 3 of Brocard et al. [1996].
kFrom Smith et al. [1999], as shown in Table 3 of Bertschi et al. [2003a].
lUncertainty was calculated by calculating the total standard dev (values from Bertschi et al. [2003a]). dCO/CO2 unc. factored in as well
Unc for CO2 not shown as no unc was reported in original work.
mFrom Pennise et al. [2001], as shown in Table 3 of Bertschi et al. [2003a]. 5 Earth mound kilns in Kenya were sampled. Values from Table 6a (EM 1-5)
nFor ER reported relative to CO, uncertainty was calculated as the total standard deviation factoring error in dER/ER and dCO/CO2 (values from Bertschi et al. [2003a]).
Unc for CO2 not shown as no unc in ER of CO2 was reported in original work.
oAverage of our measurements in addition to Lacaux, Smith, and Pennise, all weighted equally. In this case, our studies were weighted as "one" study.
NMOC summed in column P.
NMOC (identified + unidentified) estimated as 2x NMOC (identified) EF.
pUncertainty was the average stdev.

## Sheet: S10. Charcoal burning
Table S10. Emission factors from charcoal burning fires
	Charcoal Burning from Bertschi et al. [2003a]a	Charcoal Burning from Brocard et al. [1998]b	Charcoal Burning Uncertaintyc	Charcoal Burning from Smith et al. [2000]d	Charcoal Burning Uncertaintye	Charcoal Burning from Kituyi et al. [2001]f	Charcoal Burning Uncertaintyg	Charcoal Burning Averageh	Charcoal Burning Avg. Uncertaintyi
Carbon Dioxide (CO2)	2402	2279		2411		2448		2385
Carbon Monoxide (CO)	134	225	46.41	275	49	122.3	23.4	189.075	36.3534
Methane (CH4)	5.64	2.32	1.24	7.9	2.9			5.28667	2.42388
Nitric Oxide (NO)	1.163					3.34	0.5	2.2515	0.337051
Nitrogen Dioxide (NO2)	0.377							0.377
Nitrogen Oxides (NOx as NO)	1.409							1.409
Nitrous Oxide (N2O)				0.24				0.24
Ethylene (C2H4)	0.59	0.29	0.15					0.44	0.227586
Acetic Acid (CH3COOH)	2.62							2.62
Formaldehyde (HCHO)	0.6							0.6
Methanol (CH3OH)	1.01							1.01
Ammonia (NH3)	0.79							0.79
Formic Acid (HCOOH)	0.063							0.063
Acetylene (C2H2)	0.42							0.42
Ethane (C2H6)	0.62	0.19	0.06					0.405	0.127895
TSP				2.375				2.375
NMOC (identified)								5.558
NMOC (identified + unidentified)								11.116
Emission Factors (EF) in g/kg charcoal used
All uncertainty headings are colored in green.
Specific EF or uncertainties with additional notes have been colored and referenced under the corresponding column superscript.
aSource is Bertschi et al. [2003a], Table 4 column 2
EF are from the measurement of 1 charcoal cooking fire in Kaoma.
We assume a carbon content of 72 ± 3% for the charcoal burned in Bertschi et al. [2003a] data.
EF for all compounds excluding CO2 and CO were calculated in additional calculations. These values were slightly different than those reported in Bertschi et al. [2003a], Table 2.
No uncertainty was measured as only 1 fire was measured.
bData from Brocard et al. (1998) shown in additional calculations.
All EF presented from this study were recalculated using Brocard et al. [1998] ER from Table 5.
cUncertainty reported in ER measured relative to CO2. So unc is (dER/ER)*EF
dSource is Smith et al. [2000], Table 7 and Table 9.
eUncertainty from the fractional uncertainty in ER, as cited in Table 2 in Bertschi et al. [2003a]. See additional calcs.
Unless stated, all EF reported relative to CO2: unc is (dER/ER)*EF.
ER(CH4) reported relative to CO, so total std. deviation formula (factoring in error in CO/CO2) was used.
fSource is Kituyi et al. [2001], Table 1. ER converted to EF in additional calculations.
gUncertainty in ER measured relative to CO2: unc is (dER/ER)*EF. Cited in Table 2 in Bertschi et al. [2003a] and Table 1 in Kituyi et al. See additional calcs.
hAverage of studies.
NMOC summed from column I.
NMOC (identified + unidentified) estimated as 2x NMOC (identified) EF.
iUncertainty calculated as the average stdev.
No uncertainty in total NMOC was provided since most of the individual NMOC do not report an estimate of variation.

[truncated: 6 more sheets: S11. Dung burning, S12. Pasture Maintenance, S13. Crop Residue, S14. Garbage burning , Version 2 Update Information, Version 1 Update information]
